# Supplementary material for: From bonds to interactions: comprehensive molecular characterization via polarizable bond-dipole approach
Source: Royal Society of Chemistry journal article supplement (doi:10.1039/d3cp04060g), 2023-01-01
Supplement: d3cp04060g1.pdf [file d3cp04060g1.pdf]

**Supplementary information 1 for**

**From Bonds to Interactions: Comprehensive  
Molecular Characterization via Polarizable  
Bond-Dipole Approach**

Jia-Yi Zhu,<sup>‡</sup> Qi Liu,<sup>‡</sup> Xiao-Nan Jiang,<sup>‡</sup> Xiao-Han Zheng, Lei Wang,  
Qiang Hao,<sup>\*</sup> and Chang-Sheng Wang<sup>\*</sup>

School of Chemistry and Chemical Engineering,

Liaoning Normal University,

Dalian, China

## Contents

Figure S1 The diagrammatic sketch of dipole-dipole interaction

Table S1 Parameters utilized in this work

Table S2 Interaction energies of the HD16\_2D data set obtained via various methods

Table S3 Optimized monomer coordinates obtained using different methods

Table S4 Vibration frequencies of optimized monomers obtained using various methods

Table S5 Using different methods to predict the interaction energies of the equilibrium structure in S66×8 and S66 data set

Table S6 The hydrogen bond length of 16 optimized hydrogen bond complexes by different methods, initial conformation from S66 data set.

Table S7 The interaction energies of 16 optimized hydrogen bond complexes by different methods, initial conformation from S66 data set.

Table S8 Optimized trimer coordinates obtained via the MP2/cc-pVDZ method

Table S9 Interaction energies of trimers obtained using various methods

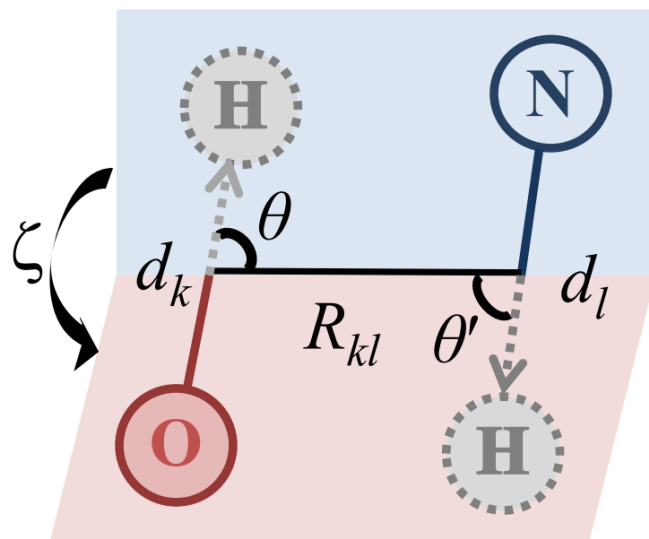

Fig. S1 The diagrammatic sketch of dipole-dipole interaction

Table S1 Parameters utilized in this work

| Parameters for bond stretching |                   |                                                                            |
|--------------------------------|-------------------|----------------------------------------------------------------------------|
| bond <sup>a</sup>              | $b_{eq}$ (Å)      | Bond force constant ( $K_b$ , kcal·mol <sup>-1</sup> ·Å <sup>-2</sup> )    |
| O-H in water                   | 0.9572            | 605.0                                                                      |
| O-H in methanol                | 0.9611            | 596.0                                                                      |
| C-H in methanol                | 1.0859            | 365.0                                                                      |
| C-O in methanol                | 1.4237            | 425.0                                                                      |
| N-H in methylamine             | 1.0120            | 510.0                                                                      |
| C-H in methylamine             | 1.0901            | 385.0                                                                      |
| C-N in methylamine             | 1.4634            | 385.0                                                                      |
| C=O in NMA                     | 1.2246            | 605.0                                                                      |
| N-H in NMA                     | 1.0090            | 534.0                                                                      |
| N-C in NMA                     | 1.3689            | 404.0                                                                      |
| N-CT in NMA                    | 1.4512            | 374.0                                                                      |
| CT-H1 in NMA                   | 1.0949            | 370.0                                                                      |
| C-CT in NMA                    | 1.5227            | 345.0                                                                      |
| CT-HC in NMA                   | 1.0946            | 370.0                                                                      |
| Parameters for angle bending   |                   |                                                                            |
| angle <sup>b</sup>             | $\theta_{eq}$ (Å) | Angle force constant ( $K_a$ , kcal·mol <sup>-1</sup> ·rad <sup>-2</sup> ) |
| ∠H-O-H in water                | 104.52            | 51.0                                                                       |
| ∠C-O-H in methanol             | 108.04            | 64.0                                                                       |
| ∠H-C-O in methanol             | 110.11            | 65.0                                                                       |
| ∠H-C-H in methanol             | 108.80            | 41.0                                                                       |
| ∠H-N-H in methylamine          | 106.31            | 40.5                                                                       |
| ∠C-N-H in methylamine          | 110.31            | 40.0                                                                       |
| ∠H-C-N in methylamine          | 111.80            | 66.0                                                                       |
| ∠H-C-H in methylamine          | 107.89            | 34.0                                                                       |
| ∠CT-C-O in NMA                 | 121.71            | 80.00                                                                      |
| ∠CT-C-N in NMA                 | 115.22            | 70.00                                                                      |
| ∠O-C-N in NMA                  | 123.07            | 76.98                                                                      |
| ∠C-N-H in NMA                  | 118.76            | 50.00                                                                      |
| ∠C-N-CT in NMA                 | 122.59            | 50.00                                                                      |
| ∠H-N-CT in NMA                 | 118.66            | 32.01                                                                      |
| ∠HC-CT-HC in NMA               | 108.36            | 39.57                                                                      |
| ∠HC-CT-C in NMA                | 110.52            | 45.85                                                                      |
| ∠N-CT-H1 in NMA                | 109.93            | 60.00                                                                      |
| ∠H1-CT-H1 in NMA               | 109.00            | 39.57                                                                      |

| Parameters for bond angle coupling | strbnd force constant<br>( $K_{ba}$ , kcal·mol <sup>-1</sup> ·Å <sup>-1</sup> ·rad <sup>-1</sup> ) |       |  | strbnd force constant<br>( $K_{ba}$ , kcal·mol <sup>-1</sup> ·Å <sup>-1</sup> ·rad <sup>-1</sup> ) |       |  |
|------------------------------------|----------------------------------------------------------------------------------------------------|-------|--|----------------------------------------------------------------------------------------------------|-------|--|
|                                    | H-O-H in water                                                                                     | 35.60 |  |                                                                                                    | 35.60 |  |
| C-O-H in methanol                  | 38.00                                                                                              |       |  | -4.50                                                                                              |       |  |
| H-C-N in methylamine               | 12.50                                                                                              |       |  | 12.50                                                                                              |       |  |
| C-N-H in methylamine               | 4.30                                                                                               |       |  | 4.30                                                                                               |       |  |
| C-CT-HC in NMA                     | 11.50                                                                                              |       |  | 11.50                                                                                              |       |  |
| N-CT-H1 in NMA                     | 11.50                                                                                              |       |  | 11.50                                                                                              |       |  |
| CT-C-O in NMA                      | 18.70                                                                                              |       |  | 18.70                                                                                              |       |  |
| CT-C-N in NMA                      | 18.70                                                                                              |       |  | 18.70                                                                                              |       |  |
| O-C-N in NMA                       | 18.70                                                                                              |       |  | 18.70                                                                                              |       |  |
| CT-N-C in NMA                      | 7.20                                                                                               |       |  | 7.20                                                                                               |       |  |
| CT-N-H in NMA                      | 4.30                                                                                               |       |  | 4.30                                                                                               |       |  |
| C-N-H in NMA                       | 4.30                                                                                               |       |  | 4.30                                                                                               |       |  |

  

| Parameters for torsion |          |     |          |          |     |          |          |     |          |
|------------------------|----------|-----|----------|----------|-----|----------|----------|-----|----------|
| torsion                | $V_1$    |     |          | $V_2$    |     |          | $V_3$    |     |          |
|                        | $K_\phi$ | $n$ | $\gamma$ | $K_\phi$ | $n$ | $\gamma$ | $K_\phi$ | $n$ | $\gamma$ |
| H-O-C-H in methanol    | 0.00     | 1   | 0        | 0.00     | 2   | 180      | 0.20     | 3   | 0        |
| H-N-C-H in methylamine | 0.00     | 1   | 0        | 0.44     | 2   | 180      | 0.25     | 3   | 0        |
| HC-CT-C-N in NMA       | 0.00     | 1   | 0        | 0.00     | 2   | 180      | 0.00     | 3   | 0        |
| HC-CT-C-O in NMA       | 0.00     | 1   | 0        | 0.00     | 2   | 180      | 0.00     | 3   | 0        |
| CT-C-N-H in NMA        | 0.00     | 1   | 0        | 1.20     | 2   | 180      | 0.00     | 3   | 0        |
| CT-C-N-CT in NMA       | 0.00     | 1   | 0        | 2.50     | 2   | 180      | 0.00     | 3   | 0        |
| O-C-N-H in NMA         | 0.00     | 1   | 0        | 0.50     | 2   | 180      | 0.00     | 3   | 0        |
| O-C-N-CT in NMA        | 0.00     | 1   | 0        | 0.50     | 2   | 180      | 0.00     | 3   | 0        |
| C-N-CT-H1 in NMA       | 0.00     | 1   | 0        | 0.00     | 2   | 180      | 0.00     | 3   | 0        |
| H-N-CT-H1 in NMA       | 0.00     | 1   | 0        | 0.00     | 2   | 180      | 0.00     | 3   | 0        |

  

| Parameters for bond dipole moments and lone pairs |                                                                                                | Dipole moment (debye) |
|---------------------------------------------------|------------------------------------------------------------------------------------------------|-----------------------|
| $\mu_0(\text{O-H})$                               | O-H in water                                                                                   | 1.51                  |
| $\mu_0(\text{O-H})$                               | O-H connected with the electron withdrawing group                                              | 1.78                  |
| $\mu_0(\text{C-O})$                               | C(sp <sup>3</sup> )-O(sp <sup>3</sup> )                                                        | 0.70                  |
| $\mu_0(\text{C-H})$                               | C(sp <sup>3</sup> )-H with electronegative neighbor N(sp <sup>3</sup> ) or O(sp <sup>3</sup> ) | 0.70                  |
| $\mu_0(\text{C-N})$                               | C(sp <sup>3</sup> )-N(sp <sup>3</sup> )                                                        | 0.70                  |
| $\mu_0(\text{N-H})$                               | N(sp <sup>3</sup> )-H connected with the electron withdrawing group                            | 1.51                  |
| $\mu_0(\text{C=O})$                               | double bond of C=O                                                                             | 2.65                  |
| $\mu_0(\text{N-H})$                               | N(sp <sup>2</sup> )-H in conjugated system                                                     | 1.51                  |
| $\mu_0(\text{C-H})$                               | C(sp <sup>3</sup> )-H with no electronegative neighbor                                         | 1.25                  |

|                                                                        |                                                               |               |              |         |         |              |
|------------------------------------------------------------------------|---------------------------------------------------------------|---------------|--------------|---------|---------|--------------|
| $\mu_0(\text{C-N})$                                                    | single bond for $\text{C}(\text{sp}^2)\text{-N}(\text{sp}^2)$ | 0.45          |              |         |         |              |
| $\mu_0(\text{C-N})$                                                    | single bond for $\text{C}(\text{sp}^3)\text{-N}(\text{sp}^2)$ | 1.20          |              |         |         |              |
| Parameters for van der Waals interaction terms <sup>c</sup>            |                                                               |               |              |         |         |              |
| O in water                                                             |                                                               | 1.6800 0.1521 |              |         |         |              |
| H in water                                                             |                                                               | 0.4500 0.0460 |              |         |         |              |
| C in alcohol                                                           |                                                               | 1.9080 0.1094 |              |         |         |              |
| H attached to a carbon in alcohol                                      |                                                               | 1.0000 0.0157 |              |         |         |              |
| O in alcohol                                                           |                                                               | 1.6690 0.1620 |              |         |         |              |
| H attached to an oxygen in alcohol                                     |                                                               | 0.6350 0.0157 |              |         |         |              |
| C in methylamine                                                       |                                                               | 1.9080 0.1094 |              |         |         |              |
| H attached to a carbon in methylamine                                  |                                                               | 1.0000 0.0157 |              |         |         |              |
| N in methylamine                                                       |                                                               | 1.6860 0.1700 |              |         |         |              |
| H attached to a nitrogen in methylamine                                |                                                               | 1.0870 0.0157 |              |         |         |              |
| $\text{sp}^2$ oxygen in carbonyl group                                 |                                                               | 1.6612 0.2100 |              |         |         |              |
| $\text{sp}^2$ carbon in carbonyl group                                 |                                                               | 1.9080 0.0860 |              |         |         |              |
| $\text{sp}^2$ nitrogen with no lone pair                               |                                                               | 1.7150 0.1700 |              |         |         |              |
| H attached to $\text{sp}^2$ nitrogen                                   |                                                               | 0.8450 0.0157 |              |         |         |              |
| $\text{sp}^3$ carbon attach to carbonyl group                          |                                                               | 1.9080 0.1094 |              |         |         |              |
| H attached to an $\text{sp}^3$ carbon with no electronegative neighbor |                                                               | 1.4000 0.0157 |              |         |         |              |
| $\text{sp}^3$ carbon with an electronegative neighbor                  |                                                               | 1.9080 0.1094 |              |         |         |              |
| H attached to an $\text{sp}^3$ carbon with electronegative neighbor    |                                                               | 0.9500 0.0157 |              |         |         |              |
| Parameters for orbital overlap term                                    | $D_m^d$                                                       | $a_m^e$       | $R_{eq,m}^f$ | $p_m^g$ | $q_m^h$ | $\alpha_m^i$ |
| O-H...O( $\text{sp}^2$ )                                               | 1.25                                                          | 1.30          | 1.85         | 0.001   | 0.28    | 0.001        |
| N-H...O( $\text{sp}^2$ )                                               | 1.05                                                          | 1.30          | 1.85         | 0.001   | 0.28    | 0.001        |
| O-H...O( $\text{sp}^3$ )                                               | 1.05                                                          | 1.30          | 1.90         | 0.001   | 0.28    | 0.001        |
| N-H...O( $\text{sp}^3$ )                                               | 1.05                                                          | 1.30          | 1.90         | 0.001   | 0.28    | 0.001        |
| O-H...N( $\text{sp}^3$ )                                               | 1.05                                                          | 1.30          | 1.95         | 0.001   | 0.28    | 0.001        |
| N-H...N( $\text{sp}^3$ )                                               | 1.05                                                          | 1.30          | 1.95         | 0.001   | 0.28    | 0.001        |

<sup>a</sup>  $K_{b1} = 2.55, K_{b2} = (7/12) \cdot K_{b1}^2$

<sup>b</sup>  $K_{a1} = 0.006, K_{a2} = (7/12) \cdot K_{a1}^2$

<sup>c</sup>  $A_{ij} = \varepsilon_{ij} \cdot (R_{ij}^*)^{12}, B_{ij} = 2\varepsilon_{ij} \cdot (R_{ij}^*)^6, R_{ij}^* = R_i^* + R_j^*, \varepsilon_{ij} = (\varepsilon_i \cdot \varepsilon_j)^{0.5}$

<sup>d</sup>  $D_m$  is the depth of the potential, in kcal·mol<sup>-1</sup>

<sup>e</sup>  $a_m$  is the width of the potential

<sup>f</sup>  $R_{eq, m}$  denotes the equilibrium hydrogen bond distance, in angstrom

<sup>g</sup>  $p_m$  is the minimum overlap integral

<sup>h</sup>  $q_m$  is the maximum overlap integral

<sup>i</sup>  $\alpha_m$  is dependent on the type of hydrogen bond

Table S2 Interaction energies(kcal·mol<sup>-1</sup>) of the HD16\_2D data set obtained via various methods

| water-water             | CCSD(T)/CBS | AMOEBA09 | PBFF  |
|-------------------------|-------------|----------|-------|
| 01_water-water_090_-40° | -2.05       | -2.36    | -3.80 |
| 01_water-water_090_-20° | -4.03       | -4.31    | -5.16 |
| 01_water-water_090_-10° | -4.44       | -4.74    | -5.39 |
| 01_water-water_090_0°   | -4.57       | -4.89    | -5.49 |
| 01_water-water_095_-40° | -3.02       | -3.30    | -4.27 |
| 01_water-water_095_-20° | -4.48       | -4.74    | -5.13 |
| 01_water-water_095_-10° | -4.79       | -5.06    | -5.28 |
| 01_water-water_095_0°   | -4.88       | -5.16    | -5.35 |
| 01_water-water_100_-40° | -3.49       | -3.70    | -4.31 |
| 01_water-water_100_-20° | -4.60       | -4.77    | -4.87 |
| 01_water-water_100_-10° | -4.83       | -5.01    | -4.97 |
| 01_water-water_100_0°   | -4.89       | -5.08    | -5.03 |
| 01_water-water_105_-40° | -3.65       | -3.77    | -4.13 |
| 01_water-water_105_-20° | -4.50       | -4.59    | -4.52 |
| 01_water-water_105_-10° | -4.67       | -4.77    | -4.59 |
| 01_water-water_105_0°   | -4.72       | -4.82    | -4.64 |
| 01_water-water_110_-40° | -3.61       | -3.65    | -3.85 |
| 01_water-water_110_-20° | -4.27       | -4.29    | -4.14 |
| 01_water-water_110_-10° | -4.41       | -4.43    | -4.19 |
| 01_water-water_110_0°   | -4.45       | -4.47    | -4.24 |
| 01_water-water_125_-40° | -2.99       | -2.88    | -2.91 |
| 01_water-water_125_-20° | -3.35       | -3.23    | -3.07 |
| 01_water-water_125_-10° | -3.43       | -3.31    | -3.11 |
| 01_water-water_125_0°   | -3.46       | -3.34    | -3.15 |
| 01_water-water_150_-40° | -1.83       | -1.71    | -1.72 |
| 01_water-water_150_-20° | -2.03       | -1.91    | -1.84 |
| 01_water-water_150_-10° | -2.08       | -1.96    | -1.88 |
| 01_water-water_150_0°   | -2.11       | -1.98    | -1.92 |
| 01_water-water_200_-40° | -0.71       | -0.67    | -0.54 |
| 01_water-water_200_-20° | -0.82       | -0.78    | -0.62 |
| 01_water-water_200_-10° | -0.85       | -0.81    | -0.65 |
| 01_water-water_200_0°   | -0.87       | -0.83    | -0.68 |

## water-methanol

|                             | CCSD(T)/CBS | AMOEBA09 | PBFF  |
|-----------------------------|-------------|----------|-------|
| 02_water-methanol_090_-30 ° | -3.42       | -2.46    | -2.92 |
| 02_water-methanol_090_-10 ° | -5.03       | -4.73    | -4.99 |
| 02_water-methanol_090_0 °   | -5.19       | -5.10    | -5.37 |
| 02_water-methanol_090_+10 ° | -5.04       | -5.09    | -5.56 |
| 02_water-methanol_095_-30 ° | -4.34       | -3.77    | -3.85 |
| 02_water-methanol_095_-10 ° | -5.46       | -5.38    | -5.20 |
| 02_water-methanol_095_0 °   | -5.55       | -5.63    | -5.45 |
| 02_water-methanol_095_+10 ° | -5.41       | -5.60    | -5.59 |
| 02_water-methanol_100_-30 ° | -4.74       | -4.38    | -4.17 |
| 02_water-methanol_100_-10 ° | -5.52       | -5.52    | -5.07 |
| 02_water-methanol_100_0 °   | -5.57       | -5.68    | -5.25 |
| 02_water-methanol_100_+10 ° | -5.44       | -5.64    | -5.35 |
| 02_water-methanol_105_-30 ° | -4.81       | -4.54    | -4.15 |
| 02_water-methanol_105_-10 ° | -5.36       | -5.36    | -4.78 |
| 02_water-methanol_105_0 °   | -5.38       | -5.48    | -4.91 |
| 02_water-methanol_105_+10 ° | -5.27       | -5.43    | -5.00 |
| 02_water-methanol_110_-30 ° | -4.68       | -4.45    | -3.97 |
| 02_water-methanol_110_-10 ° | -5.07       | -5.05    | -4.42 |
| 02_water-methanol_110_0 °   | -5.08       | -5.13    | -4.53 |
| 02_water-methanol_110_+10 ° | -4.98       | -5.08    | -4.61 |
| 02_water-methanol_125_-30 ° | -3.79       | -3.59    | -3.12 |
| 02_water-methanol_125_-10 ° | -3.95       | -3.86    | -3.35 |
| 02_water-methanol_125_0 °   | -3.94       | -3.90    | -3.42 |
| 02_water-methanol_125_+10 ° | -3.89       | -3.87    | -3.47 |
| 02_water-methanol_150_-30 ° | -2.30       | -2.15    | -1.88 |
| 02_water-methanol_150_-10 ° | -2.38       | -2.29    | -2.03 |
| 02_water-methanol_150_0 °   | -2.39       | -2.32    | -2.08 |
| 02_water-methanol_150_+10 ° | -2.37       | -2.31    | -2.13 |
| 02_water-methanol_200_-30 ° | -0.87       | -0.83    | -0.69 |
| 02_water-methanol_200_-10 ° | -0.94       | -0.92    | -0.79 |
| 02_water-methanol_200_0 °   | -0.95       | -0.94    | -0.82 |
| 02_water-methanol_200_+10 ° | -0.96       | -0.95    | -0.85 |



## water-methylamine

|                                | CCSD(T)/CBS | AMOEBA09 | PBFF  |
|--------------------------------|-------------|----------|-------|
| 03_water-methylamine_090_-40 ° | -3.04       | -3.63    | -5.00 |
| 03_water-methylamine_090_-20 ° | -5.75       | -7.12    | -6.58 |
| 03_water-methylamine_090_-10 ° | -6.33       | -7.99    | -6.88 |
| 03_water-methylamine_090_0 °   | -6.49       | -8.36    | -7.03 |
| 03_water-methylamine_095_-40 ° | -4.15       | -4.90    | -5.37 |
| 03_water-methylamine_095_-20 ° | -6.27       | -7.58    | -6.41 |
| 03_water-methylamine_095_-10 ° | -6.74       | -8.27    | -6.62 |
| 03_water-methylamine_095_0 °   | -6.87       | -8.56    | -6.74 |
| 03_water-methylamine_100_-40 ° | -4.70       | -5.37    | -5.29 |
| 03_water-methylamine_100_-20 ° | -6.39       | -7.47    | -6.00 |
| 03_water-methylamine_100_-10 ° | -6.76       | -8.01    | -6.16 |
| 03_water-methylamine_100_0 °   | -6.88       | -8.25    | -6.26 |
| 03_water-methylamine_105_-40 ° | -4.88       | -5.38    | -4.98 |
| 03_water-methylamine_105_-20 ° | -6.24       | -7.04    | -5.51 |
| 03_water-methylamine_105_-10 ° | -6.55       | -7.48    | -5.63 |
| 03_water-methylamine_105_0 °   | -7.35       | -7.68    | -5.73 |
| 03_water-methylamine_110_-40 ° | -4.82       | -5.14    | -4.59 |
| 03_water-methylamine_110_-20 ° | -5.93       | -6.48    | -5.00 |
| 03_water-methylamine_110_-10 ° | -6.19       | -6.84    | -5.11 |
| 03_water-methylamine_110_0 °   | -6.28       | -7.02    | -5.19 |
| 03_water-methylamine_125_-40 ° | -3.99       | -3.91    | -3.36 |
| 03_water-methylamine_125_-20 ° | -4.67       | -4.71    | -3.63 |
| 03_water-methylamine_125_-10 ° | -4.84       | -4.94    | -3.72 |
| 03_water-methylamine_125_0 °   | -4.92       | -5.07    | -3.79 |
| 03_water-methylamine_150_-40 ° | -2.40       | -2.17    | -1.90 |
| 03_water-methylamine_150_-20 ° | -2.80       | -2.63    | -2.11 |
| 03_water-methylamine_150_-10 ° | -2.91       | -2.77    | -2.19 |
| 03_water-methylamine_150_0 °   | -2.98       | -2.86    | -2.25 |
| 03_water-methylamine_200_-40 ° | -0.82       | -0.70    | -0.52 |
| 03_water-methylamine_200_-20 ° | -1.02       | -0.94    | -0.66 |
| 03_water-methylamine_200_-10 ° | -1.09       | -1.02    | -0.72 |
| 03_water-methylamine_200_0 °   | -1.14       | -1.08    | -0.76 |

## water-NMA

|                        | CCSD(T)/CBS | AMOEBA09 | PBFF  |
|------------------------|-------------|----------|-------|
| 04_water-NMA_090_-30 ° | -2.56       | -0.66    | -0.53 |
| 04_water-NMA_090_-10 ° | -7.22       | -6.67    | -7.28 |
| 04_water-NMA_090_0 °   | -7.63       | -7.56    | -7.85 |
| 04_water-NMA_090_+10 ° | -7.47       | -7.75    | -7.88 |
| 04_water-NMA_095_-30 ° | -4.66       | -3.13    | -3.71 |
| 04_water-NMA_095_-10 ° | -7.82       | -7.48    | -7.96 |
| 04_water-NMA_095_0 °   | -8.06       | -8.08    | -8.21 |
| 04_water-NMA_095_+10 ° | -7.86       | -8.14    | -8.13 |
| 04_water-NMA_100_-30 ° | -5.72       | -4.57    | -5.42 |
| 04_water-NMA_100_-10 ° | -7.97       | -7.68    | -8.01 |
| 04_water-NMA_100_0 °   | -8.08       | -8.05    | -8.07 |
| 04_water-NMA_100_+10 ° | -7.86       | -8.05    | -7.92 |
| 04_water-NMA_105_-30 ° | -6.26       | -5.31    | -6.26 |
| 04_water-NMA_105_-10 ° | -7.82       | -7.50    | -7.75 |
| 04_water-NMA_105_0 °   | -7.85       | -7.73    | -7.69 |
| 04_water-NMA_105_+10 ° | -7.63       | -7.68    | -7.50 |
| 04_water-NMA_110_-30 ° | -6.45       | -5.61    | -6.55 |
| 04_water-NMA_110_-10 ° | -7.50       | -7.13    | -7.33 |
| 04_water-NMA_110_0 °   | -7.46       | -7.25    | -7.19 |
| 04_water-NMA_110_+10 ° | -7.25       | -7.17    | -6.99 |
| 04_water-NMA_125_-30 ° | -5.87       | -5.16    | -5.98 |
| 04_water-NMA_125_-10 ° | -6.11       | -5.60    | -5.82 |
| 04_water-NMA_125_0 °   | -6.00       | -5.58    | -5.61 |
| 04_water-NMA_125_+10 ° | -5.82       | -5.48    | -5.42 |
| 04_water-NMA_150_-30 ° | -4.01       | -3.40    | -4.08 |
| 04_water-NMA_150_-10 ° | -3.92       | -3.44    | -3.72 |
| 04_water-NMA_150_0 °   | -3.83       | -3.40    | -3.56 |
| 04_water-NMA_150_+10 ° | -3.72       | -3.34    | -3.42 |
| 04_water-NMA_200_-30 ° | -1.68       | -1.35    | -1.74 |
| 04_water-NMA_200_-10 ° | -1.66       | -1.40    | -1.58 |
| 04_water-NMA_200_0 °   | -1.63       | -1.41    | -1.51 |
| 04_water-NMA_200_+10 ° | -1.60       | -1.40    | -1.45 |

## methanol-methanol

|                                  | CCSD(T)/CBS | AMOEBA09 | PBFF  |
|----------------------------------|-------------|----------|-------|
| 05_methanol-methanol_090_-40 °   | -0.51       | 2.53     | -0.42 |
| 05_methanol-methanol_090_-20 °   | -4.49       | -3.10    | -5.11 |
| 05_methanol-methanol_090_-10 °   | -5.08       | -4.06    | -5.67 |
| 05_methanol-methanol_090_0 °     | -5.27       | -4.48    | -5.92 |
| 05_methanol-methanol_095_-40 °   | -2.66       | -0.95    | -3.27 |
| 05_methanol-methanol_095_-20 °   | -5.16       | -4.35    | -5.73 |
| 05_methanol-methanol_095_-10 °   | -5.57       | -5.00    | -6.06 |
| 05_methanol-methanol_095_0 °     | -5.69       | -5.29    | -6.21 |
| 05_methanol-methanol_100_-40 °   | -3.73       | -2.73    | -4.38 |
| 05_methanol-methanol_100_-20 °   | -5.37       | -4.87    | -5.75 |
| 05_methanol-methanol_100_-10 °   | -5.66       | -5.32    | -5.95 |
| 05_methanol-methanol_100_0 °     | -5.75       | -5.52    | -6.05 |
| 05_methanol-methanol_105_-40 °   | -4.17       | -3.55    | -4.68 |
| 05_methanol-methanol_105_-20 °   | -5.30       | -4.95    | -5.50 |
| 05_methanol-methanol_105_-10 °   | -5.52       | -5.28    | -5.63 |
| 05_methanol-methanol_105_0 °     | -5.58       | -5.42    | -5.69 |
| 05_methanol-methanol_110_-40 °   | -4.26       | -3.83    | -4.59 |
| 05_methanol-methanol_110_-20 °   | -5.07       | -4.79    | -5.12 |
| 05_methanol-methanol_110_-10 °   | -5.23       | -5.03    | -5.21 |
| 05_methanol-methanol_110_0 °     | -5.28       | -5.14    | -5.26 |
| 05_methanol-methanol_125_-40 °   | -3.61       | -3.38    | -3.66 |
| 05_methanol-methanol_125_-20 °   | -4.01       | -3.79    | -3.88 |
| 05_methanol-methanol_125_-10 °   | -4.10       | -3.92    | -3.94 |
| 05_methanol-methanol_125_0 °     | -4.13       | -3.98    | -3.97 |
| 05_methanol-methanol_-20 °_-40 ° | -2.20       | -2.06    | -2.19 |
| 05_methanol-methanol_-20 °_-20 ° | -2.43       | -2.29    | -2.34 |
| 05_methanol-methanol_-20 °_-10 ° | -2.49       | -2.36    | -2.39 |
| 05_methanol-methanol_-20 °_0 °   | -2.52       | -2.40    | -2.42 |
| 05_methanol-methanol_200_-40 °   | -0.82       | -0.79    | -0.80 |
| 05_methanol-methanol_200_-20 °   | -0.95       | -0.92    | -0.91 |
| 05_methanol-methanol_200_-10 °   | -0.99       | -0.97    | -0.95 |
| 05_methanol-methanol_200_0 °     | -1.01       | -0.99    | -0.97 |

## methanol\_methylamine

|                                   | CCSD(T)/CBS | AMOEBA09 | PBFF  |
|-----------------------------------|-------------|----------|-------|
| 06_methanol_methylamine_090_-40 ° | -3.97       | -3.20    | -7.19 |
| 06_methanol_methylamine_090_-20 ° | -6.31       | -6.21    | -7.98 |
| 06_methanol_methylamine_090_-10 ° | -6.85       | -6.97    | -8.03 |
| 06_methanol_methylamine_090_0 °   | -6.97       | -7.15    | -7.89 |
| 06_methanol_methylamine_095_-40 ° | -4.95       | -4.66    | -7.42 |
| 06_methanol_methylamine_095_-20 ° | -6.85       | -7.04    | -7.92 |
| 06_methanol_methylamine_095_-10 ° | -7.31       | -7.68    | -7.95 |
| 06_methanol_methylamine_095_0 °   | -7.47       | -7.89    | -7.87 |
| 06_methanol_methylamine_100_-40 ° | -5.40       | -5.27    | -7.15 |
| 06_methanol_methylamine_100_-20 ° | -6.96       | -7.18    | -7.49 |
| 06_methanol_methylamine_100_-10 ° | -7.36       | -7.72    | -7.51 |
| 06_methanol_methylamine_100_0 °   | -7.54       | -7.95    | -7.46 |
| 06_methanol_methylamine_105_-40 ° | -5.51       | -5.37    | -6.67 |
| 06_methanol_methylamine_105_-20 ° | -6.79       | -6.93    | -6.91 |
| 06_methanol_methylamine_105_-10 ° | -7.15       | -7.39    | -6.93 |
| 06_methanol_methylamine_105_0 °   | -7.34       | -7.63    | -6.91 |
| 06_methanol_methylamine_110_-40 ° | -5.39       | -5.18    | -6.11 |
| 06_methanol_methylamine_110_-20 ° | -6.47       | -6.47    | -6.29 |
| 06_methanol_methylamine_110_-10 ° | -6.78       | -6.87    | -6.31 |
| 06_methanol_methylamine_110_0 °   | -6.97       | -7.11    | -6.31 |
| 06_methanol_methylamine_125_-40 ° | -4.42       | -4.03    | -4.49 |
| 06_methanol_methylamine_125_-20 ° | -5.12       | -4.84    | -4.61 |
| 06_methanol_methylamine_125_-10 ° | -5.34       | -5.11    | -4.64 |
| 06_methanol_methylamine_125_0 °   | -5.50       | -5.31    | -4.66 |
| 06_methanol_methylamine_150_-40 ° | -2.68       | -2.28    | -2.61 |
| 06_methanol_methylamine_150_-20 ° | -3.09       | -2.75    | -2.72 |
| 06_methanol_methylamine_150_-10 ° | -3.23       | -2.92    | -2.75 |
| 06_methanol_methylamine_150_0 °   | -3.35       | -3.05    | -2.78 |
| 06_methanol_methylamine_200_-40 ° | -0.94       | -0.76    | -0.95 |
| 06_methanol_methylamine_200_-20 ° | -1.14       | -1.00    | -1.04 |
| 06_methanol_methylamine_200_-10 ° | -1.22       | -1.08    | -1.06 |
| 06_methanol_methylamine_200_0 °   | -1.27       | -1.15    | -1.09 |

## methanol-NMA

|                          | CCSD(T)/CBS | AMOEBA09 | PBFF  |
|--------------------------|-------------|----------|-------|
| 07_methanol-NMA_090_-30° | -2.65       | -1.33    | -0.93 |
| 07_methanol-NMA_090_-10° | -7.12       | -6.59    | -7.40 |
| 07_methanol-NMA_090_0°   | -7.62       | -7.28    | -7.59 |
| 07_methanol-NMA_090_+10° | -7.50       | -7.30    | -7.24 |
| 07_methanol-NMA_095_-30° | -4.58       | -3.90    | -4.40 |
| 07_methanol-NMA_095_-10° | -7.84       | -7.57    | -8.42 |
| 07_methanol-NMA_095_0°   | -8.14       | -7.97    | -8.35 |
| 07_methanol-NMA_095_+10° | -7.95       | -7.88    | -7.94 |
| 07_methanol-NMA_100_-30° | -5.75       | -5.39    | -6.26 |
| 07_methanol-NMA_100_-10° | -8.08       | -7.87    | -8.59 |
| 07_methanol-NMA_100_0°   | -8.22       | -8.07    | -8.36 |
| 07_methanol-NMA_100_+10° | -7.99       | -7.91    | -7.92 |
| 07_methanol-NMA_105_-30° | -6.38       | -6.15    | -7.15 |
| 07_methanol-NMA_105_-10° | -8.00       | -7.76    | -8.34 |
| 07_methanol-NMA_105_0°   | -8.03       | -7.82    | -8.02 |
| 07_methanol-NMA_105_+10° | -7.77       | -7.62    | -7.57 |
| 07_methanol-NMA_110_-30° | -6.64       | -6.44    | -7.45 |
| 07_methanol-NMA_110_-10° | -7.72       | -7.42    | -7.88 |
| 07_methanol-NMA_110_0°   | -7.67       | -7.15    | -7.07 |
| 07_methanol-NMA_110_+10° | -7.40       | -7.15    | -7.07 |
| 07_methanol-NMA_125_-30° | -6.19       | -5.89    | -6.74 |
| 07_methanol-NMA_125_-10° | -6.36       | -5.89    | -6.21 |
| 07_methanol-NMA_125_0°   | -6.19       | -5.73    | -5.82 |
| 07_methanol-NMA_125_+10° | -5.93       | -5.50    | -5.44 |
| 07_methanol-NMA_150_-30° | -4.33       | -3.89    | -4.52 |
| 07_methanol-NMA_150_-10° | -4.12       | -3.62    | -3.89 |
| 07_methanol-NMA_150_0°   | -3.95       | -3.48    | -3.60 |
| 07_methanol-NMA_150_+10° | -3.75       | -3.32    | -3.34 |
| 07_methanol-NMA_200_-30° | -1.83       | -1.54    | -1.86 |
| 07_methanol-NMA_200_-10° | -1.71       | -1.46    | -1.57 |
| 07_methanol-NMA_200_0°   | -1.63       | -1.41    | -1.44 |
| 07_methanol-NMA_200_+10° | -1.54       | -1.35    | -1.31 |

## methanol-water

|                             | CCSD(T)/CBS | AMOEBA09 | PBFF  |
|-----------------------------|-------------|----------|-------|
| 08_methanol-water_090_-40 ° | -2.21       | -1.82    | -4.99 |
| 08_methanol-water_090_-20 ° | -4.07       | -3.66    | -5.84 |
| 08_methanol-water_090_-10 ° | -4.47       | -4.09    | -5.91 |
| 08_methanol-water_090_0 °   | -4.59       | -4.24    | -5.84 |
| 08_methanol-water_095_-40 ° | -3.12       | -2.88    | -5.41 |
| 08_methanol-water_095_-20 ° | -4.54       | -4.28    | -5.91 |
| 08_methanol-water_095_-10 ° | -4.85       | -4.61    | -5.93 |
| 08_methanol-water_095_0 °   | -4.95       | -4.73    | -5.87 |
| 08_methanol-water_100_-40 ° | -3.56       | -3.36    | -5.35 |
| 08_methanol-water_100_-20 ° | -4.67       | -4.44    | -5.65 |
| 08_methanol-water_100_-10 ° | -4.91       | -4.71    | -5.65 |
| 08_methanol-water_100_0 °   | -5.00       | -4.81    | -5.60 |
| 08_methanol-water_105_-40 ° | -3.70       | -3.51    | -5.07 |
| 08_methanol-water_105_-20 ° | -4.58       | -4.35    | -5.26 |
| 08_methanol-water_105_-10 ° | -4.78       | -4.57    | -5.25 |
| 08_methanol-water_105_0 °   | -4.85       | -4.65    | -5.20 |
| 08_methanol-water_110_-40 ° | -3.66       | -3.44    | -4.70 |
| 08_methanol-water_110_-20 ° | -4.36       | -4.13    | -4.82 |
| 08_methanol-water_110_-10 ° | -4.52       | -4.30    | -4.81 |
| 08_methanol-water_110_0 °   | -4.59       | -4.37    | -4.77 |
| 08_methanol-water_125_-40 ° | -3.03       | -2.79    | -3.53 |
| 08_methanol-water_125_-20 ° | -3.44       | -3.19    | -3.59 |
| 08_methanol-water_125_-10 ° | -3.54       | -3.30    | -3.58 |
| 08_methanol-water_125_0 °   | -3.59       | -3.35    | -3.56 |
| 08_methanol-water_150_-40 ° | -1.87       | -1.68    | -2.11 |
| 08_methanol-water_150_-20 ° | -2.11       | -1.92    | -2.16 |
| 08_methanol-water_150_-10 ° | -2.17       | -1.99    | -2.16 |
| 08_methanol-water_150_0 °   | -2.20       | -2.02    | -2.16 |
| 08_methanol-water_200_-40 ° | -0.73       | -0.67    | -0.79 |
| 08_methanol-water_200_-20 ° | -0.85       | -0.79    | -0.84 |
| 08_methanol-water_200_-10 ° | -0.89       | -0.83    | -0.85 |
| 08_methanol-water_200_0 °   | -0.91       | -0.85    | -0.86 |

## methylamine-methanol

|                                  | CCSD(T)/CBS | AMOEBA09 | PBFF  |
|----------------------------------|-------------|----------|-------|
| 09_methylamine-methanol_090_-40° | -1.98       | -1.82    | -2.84 |
| 09_methylamine-methanol_090_-20° | -2.60       | -2.31    | -2.86 |
| 09_methylamine-methanol_090_-10° | -2.78       | -2.47    | -2.84 |
| 09_methylamine-methanol_090_0°   | -2.81       | -2.53    | -2.76 |
| 09_methylamine-methanol_095_-40° | -2.31       | -2.22    | -3.23 |
| 09_methylamine-methanol_095_-20° | -2.79       | -2.60    | -3.22 |
| 09_methylamine-methanol_095_-10° | -2.96       | -2.76    | -3.21 |
| 09_methylamine-methanol_095_0°   | -3.04       | -2.86    | -3.17 |
| 09_methylamine-methanol_100_-40° | -2.40       | -2.32    | -3.20 |
| 09_methylamine-methanol_100_-20° | -2.78       | -2.62    | -3.18 |
| 09_methylamine-methanol_100_-10° | -2.93       | -2.77    | -3.17 |
| 09_methylamine-methanol_100_0°   | -3.04       | -2.89    | -3.15 |
| 09_methylamine-methanol_105_-40° | -2.35       | -2.25    | -3.01 |
| 09_methylamine-methanol_105_-20° | -2.65       | -2.50    | -2.98 |
| 09_methylamine-methanol_105_-10° | -2.78       | -2.63    | -2.97 |
| 09_methylamine-methanol_105_0°   | -2.90       | -2.76    | -2.96 |
| 09_methylamine-methanol_110_-40° | -2.22       | -2.10    | -2.75 |
| 09_methylamine-methanol_110_-20° | -2.46       | -2.30    | -2.71 |
| 09_methylamine-methanol_110_-10° | -2.58       | -2.42    | -2.71 |
| 09_methylamine-methanol_110_0°   | -2.69       | -2.54    | -2.70 |
| 09_methylamine-methanol_125_-40° | -1.68       | -1.54    | -1.98 |
| 09_methylamine-methanol_125_-20° | -1.82       | -1.66    | -1.94 |
| 09_methylamine-methanol_125_-10° | -1.89       | -1.73    | -1.93 |
| 09_methylamine-methanol_125_0°   | -1.98       | -1.82    | -1.93 |
| 09_methylamine-methanol_150_-40° | -0.96       | -0.86    | -1.10 |
| 09_methylamine-methanol_150_-20° | -1.02       | -0.91    | -1.08 |
| 09_methylamine-methanol_150_-10° | -1.06       | -0.95    | -1.07 |
| 09_methylamine-methanol_150_0°   | -1.10       | -1.00    | -1.06 |
| 09_methylamine-methanol_200_-40° | -0.36       | -0.32    | -0.34 |
| 09_methylamine-methanol_200_-20° | -0.37       | -0.34    | -0.33 |
| 09_methylamine-methanol_200_-10° | -0.38       | -0.35    | -0.32 |
| 09_methylamine-methanol_200_0°   | -0.39       | -0.36    | -0.31 |

## methylamine-methylamine

|                                     | CCSD(T)/CBS | AMOEB09 | PBFF  |
|-------------------------------------|-------------|---------|-------|
| 10_methylamine-methylamine_090_-40° | -2.31       | -1.26   | -3.74 |
| 10_methylamine-methylamine_090_-20° | -3.47       | -1.79   | -3.87 |
| 10_methylamine-methylamine_090_-10° | -3.75       | -1.77   | -3.87 |
| 10_methylamine-methylamine_090_0°   | -3.70       | -1.37   | -3.75 |
| 10_methylamine-methylamine_095_-40° | -2.78       | -2.17   | -4.06 |
| 10_methylamine-methylamine_095_-20° | -3.75       | -2.66   | -4.17 |
| 10_methylamine-methylamine_095_-10° | -4.03       | -2.73   | -4.20 |
| 10_methylamine-methylamine_095_0°   | -4.09       | -2.58   | -4.16 |
| 10_methylamine-methylamine_100_-40° | -2.96       | -2.59   | -3.94 |
| 10_methylamine-methylamine_100_-20° | -3.76       | -3.02   | -4.04 |
| 10_methylamine-methylamine_100_-10° | -4.02       | -3.14   | -4.07 |
| 10_methylamine-methylamine_100_0°   | -4.15       | -3.13   | -4.07 |
| 10_methylamine-methylamine_105_-40° | -2.95       | -2.70   | -3.65 |
| 10_methylamine-methylamine_105_-20° | -3.61       | -3.08   | -3.73 |
| 10_methylamine-methylamine_105_-10° | -3.85       | -3.22   | -3.76 |
| 10_methylamine-methylamine_105_0°   | -4.01       | -3.29   | -3.78 |
| 10_methylamine-methylamine_110_-40° | -2.83       | -2.63   | -3.31 |
| 10_methylamine-methylamine_110_-20° | -3.37       | -2.97   | -3.36 |
| 10_methylamine-methylamine_110_-10° | -3.59       | -3.11   | -3.39 |
| 10_methylamine-methylamine_110_0°   | -3.75       | -3.22   | -3.42 |
| 10_methylamine-methylamine_125_-40° | -2.21       | -2.07   | -2.33 |
| 10_methylamine-methylamine_125_-20° | -2.52       | -2.28   | -2.35 |
| 10_methylamine-methylamine_125_-10° | -2.66       | -2.38   | -2.36 |
| 10_methylamine-methylamine_125_0°   | -2.79       | -2.49   | -2.37 |
| 10_methylamine-methylamine_150_-40° | -1.30       | -1.19   | -1.27 |
| 10_methylamine-methylamine_150_-20° | -1.42       | -1.28   | -1.26 |
| 10_methylamine-methylamine_150_-10° | -1.48       | -1.32   | -1.26 |
| 10_methylamine-methylamine_150_0°   | -1.54       | -1.37   | -1.24 |
| 10_methylamine-methylamine_200_-40° | -0.48       | -0.44   | -0.39 |
| 10_methylamine-methylamine_200_-20° | -0.50       | -0.45   | -0.36 |
| 10_methylamine-methylamine_200_-10° | -0.51       | -0.46   | -0.35 |
| 10_methylamine-methylamine_200_0°   | -0.51       | -0.45   | -0.33 |



## methylamine-NMA

|                              | CCSD(T)/CBS | AMOEBA09 | PBFF  |
|------------------------------|-------------|----------|-------|
| 11_methylamine-NMA_090_-10 ° | -3.88       | -1.67    | -3.77 |
| 11_methylamine-NMA_090_0 °   | -4.95       | -3.69    | -4.94 |
| 11_methylamine-NMA_090_+10 ° | -5.12       | -4.19    | -5.17 |
| 11_methylamine-NMA_090_+20 ° | -4.94       | -4.13    | -5.05 |
| 11_methylamine-NMA_090_+30 ° | -4.60       | -3.86    | -4.82 |
| 11_methylamine-NMA_095_-10 ° | -4.80       | -3.32    | -5.20 |
| 11_methylamine-NMA_095_0 °   | -5.36       | -4.50    | -5.73 |
| 11_methylamine-NMA_095_+10 ° | -5.30       | -4.63    | -5.70 |
| 11_methylamine-NMA_095_+20 ° | -5.03       | -4.42    | -5.48 |
| 11_methylamine-NMA_095_+30 ° | -4.67       | -4.11    | -5.22 |
| 11_methylamine-NMA_100_-10 ° | -5.21       | -4.18    | -5.68 |
| 11_methylamine-NMA_100_0 °   | -5.41       | -4.77    | -5.82 |
| 11_methylamine-NMA_100_+10 ° | -5.20       | -4.67    | -5.64 |
| 11_methylamine-NMA_100_+20 ° | -4.89       | -4.39    | -5.37 |
| 11_methylamine-NMA_100_+30 ° | -4.54       | -4.05    | -5.11 |
| 11_methylamine-NMA_105_-10 ° | -5.28       | -4.52    | -5.68 |
| 11_methylamine-NMA_105_0 °   | -5.24       | -4.72    | -5.58 |
| 11_methylamine-NMA_105_+10 ° | -4.95       | -4.49    | -5.32 |
| 11_methylamine-NMA_105_+20 ° | -4.61       | -4.16    | -5.03 |
| 11_methylamine-NMA_105_+30 ° | -4.28       | -3.83    | -4.77 |
| 11_methylamine-NMA_110_-10 ° | -5.14       | -4.55    | -5.44 |
| 11_methylamine-NMA_110_0 °   | -4.94       | -4.49    | -5.20 |
| 11_methylamine-NMA_110_+10 ° | -4.61       | -4.19    | -4.89 |
| 11_methylamine-NMA_110_+20 ° | -4.28       | -3.85    | -4.61 |
| 11_methylamine-NMA_110_+30 ° | -3.96       | -3.54    | -4.37 |
| 11_methylamine-NMA_125_-10 ° | -4.17       | -3.77    | -4.25 |
| 11_methylamine-NMA_125_0 °   | -3.80       | -3.43    | -3.89 |
| 11_methylamine-NMA_125_+10 ° | -3.47       | -3.10    | -3.60 |
| 11_methylamine-NMA_125_+20 ° | -3.20       | -2.81    | -3.36 |
| 11_methylamine-NMA_125_+30 ° | -2.96       | -2.57    | -3.18 |
| 11_methylamine-NMA_150_-10 ° | -2.50       | -2.21    | -2.53 |
| 11_methylamine-NMA_150_0 °   | -2.22       | -1.93    | -2.27 |
| 11_methylamine-NMA_150_+10 ° | -2.01       | -1.72    | -2.08 |
| 11_methylamine-NMA_150_+20 ° | -1.85       | -1.56    | -1.94 |
| 11_methylamine-NMA_150_+30 ° | -1.72       | -1.43    | -1.84 |
| 11_methylamine-NMA_200_-10 ° | -0.88       | -0.73    | -0.88 |
| 11_methylamine-NMA_200_0 °   | -0.80       | -0.65    | -0.79 |
| 11_methylamine-NMA_200_+10 ° | -0.74       | -0.60    | -0.73 |
| 11_methylamine-NMA_200_+20 ° | -0.69       | -0.55    | -0.68 |
| 11_methylamine-NMA_200_+30 ° | -0.65       | -0.52    | -0.65 |

## methylamine-water

|                                | CCSD(T)/CBS | AMOEBA09 | PBFF  |
|--------------------------------|-------------|----------|-------|
| 12_methylamine-water_090_-30 ° | -3.77       | -1.03    | -2.48 |
| 12_methylamine-water_090_-10 ° | -6.48       | -5.29    | -6.27 |
| 12_methylamine-water_090_0 °   | -6.75       | -5.97    | -6.92 |
| 12_methylamine-water_090_+10 ° | -6.55       | -6.02    | -7.25 |
| 12_methylamine-water_095_-30 ° | -5.13       | -3.46    | -3.97 |
| 12_methylamine-water_095_-10 ° | -7.04       | -6.47    | -6.42 |
| 12_methylamine-water_095_0 °   | -7.20       | -6.92    | -6.85 |
| 12_methylamine-water_095_+10 ° | -7.02       | -6.91    | -7.09 |
| 12_methylamine-water_100_-30 ° | -5.80       | -4.75    | -4.56 |
| 12_methylamine-water_100_-10 ° | -7.15       | -6.87    | -6.18 |
| 12_methylamine-water_100_0 °   | -7.25       | -7.17    | -6.48 |
| 12_methylamine-water_100_+10 ° | -7.08       | -7.13    | -6.66 |
| 12_methylamine-water_105_-30 ° | -6.01       | -5.30    | -4.65 |
| 12_methylamine-water_105_-10 ° | -6.98       | -6.80    | -5.77 |
| 12_methylamine-water_105_0 °   | -7.03       | -7.01    | -5.99 |
| 12_methylamine-water_105_+10 ° | -6.88       | -6.96    | -6.13 |
| 12_methylamine-water_110_-30 ° | -5.68       | -5.41    | -4.49 |
| 12_methylamine-water_110_-10 ° | -6.41       | -6.48    | -5.29 |
| 12_methylamine-water_110_0 °   | -6.45       | -6.62    | -5.47 |
| 12_methylamine-water_110_+10 ° | -6.32       | -6.57    | -5.59 |
| 12_methylamine-water_125_-30 ° | -4.77       | -4.57    | -3.51 |
| 12_methylamine-water_125_-10 ° | -5.09       | -5.02    | -3.91 |
| 12_methylamine-water_125_0 °   | -5.11       | -5.08    | -4.02 |
| 12_methylamine-water_125_+10 ° | -5.04       | -5.04    | -4.11 |
| 12_methylamine-water_150_-30 ° | -2.91       | -2.72    | -2.04 |
| 12_methylamine-water_150_-10 ° | -3.08       | -2.94    | -2.29 |
| 12_methylamine-water_150_0 °   | -3.11       | -2.98    | -2.37 |
| 12_methylamine-water_150_+10 ° | -3.10       | -2.98    | -2.44 |
| 12_methylamine-water_200_-30 ° | -1.02       | -0.95    | -0.68 |
| 12_methylamine-water_200_-10 ° | -1.15       | -1.09    | -0.84 |
| 12_methylamine-water_200_0 °   | -1.18       | -1.13    | -0.89 |
| 12_methylamine-water_200_+10 ° | -1.20       | -1.15    | -0.94 |

## NMA-methanol

|                          | CCSD(T)/CBS | AMOEBA09 | PBFF  |
|--------------------------|-------------|----------|-------|
| 13_NMA-methanol_090_-30° | -3.34       | -1.45    | -4.04 |
| 13_NMA-methanol_090_-10° | -5.41       | -4.36    | -5.54 |
| 13_NMA-methanol_090_0°   | -5.63       | -4.80    | -5.71 |
| 13_NMA-methanol_090_+10° | -5.61       | -4.85    | -5.73 |
| 13_NMA-methanol_095_-30° | -4.55       | -3.63    | -5.53 |
| 13_NMA-methanol_095_-10° | -5.96       | -5.54    | -6.37 |
| 13_NMA-methanol_095_0°   | -6.11       | -5.80    | -6.43 |
| 13_NMA-methanol_095_+10° | -6.02       | -5.77    | -6.41 |
| 13_NMA-methanol_100_-30° | -5.17       | -4.81    | -6.04 |
| 13_NMA-methanol_100_-10° | -6.11       | -6.04    | -6.48 |
| 13_NMA-methanol_100_0°   | -6.18       | -6.17    | -6.48 |
| 13_NMA-methanol_100_+10° | -6.07       | -6.10    | -6.44 |
| 13_NMA-methanol_105_-30° | -5.39       | -5.34    | -6.05 |
| 13_NMA-methanol_105_-10° | -6.01       | -6.11    | -6.26 |
| 13_NMA-methanol_105_0°   | -6.03       | -6.16    | -6.23 |
| 13_NMA-methanol_105_+10° | -5.91       | -6.07    | -6.17 |
| 13_NMA-methanol_110_-30° | -5.36       | -5.48    | -5.81 |
| 13_NMA-methanol_110_-10° | -5.75       | -5.94    | -5.89 |
| 13_NMA-methanol_110_0°   | -5.74       | -5.94    | -5.84 |
| 13_NMA-methanol_110_+10° | -5.63       | -5.83    | -5.78 |
| 13_NMA-methanol_125_-30° | -4.59       | -4.78    | -4.66 |
| 13_NMA-methanol_125_-10° | -4.65       | -4.84    | -4.61 |
| 13_NMA-methanol_125_0°   | -4.61       | -4.78    | -4.56 |
| 13_NMA-methanol_125_+10° | -4.50       | -4.68    | -4.50 |
| 13_NMA-methanol_150_-30° | -3.00       | -3.09    | -2.97 |
| 13_NMA-methanol_150_-10° | -2.99       | -3.07    | -2.94 |
| 13_NMA-methanol_150_0°   | -2.95       | -3.03    | -2.91 |
| 13_NMA-methanol_150_+10° | -2.88       | -2.96    | -2.87 |
| 13_NMA-methanol_200_-30° | -1.30       | -1.33    | -1.18 |
| 13_NMA-methanol_200_-10° | -1.31       | -1.35    | -1.19 |
| 13_NMA-methanol_200_0°   | -1.20       | -1.34    | -1.19 |
| 13_NMA-methanol_200_+10° | -1.28       | -1.32    | -1.18 |

## NMA-methylamine

|                                | CCSD(T)/CBS | AMOEBA09 | PBFF  |
|--------------------------------|-------------|----------|-------|
| 14_NMA-methylamine_090_-40 °   | -1.87       | 0.75     | -4.44 |
| 14_NMA-methylamine_090_-20 °   | -5.75       | -4.54    | -7.03 |
| 14_NMA-methylamine_090_-10 °   | -6.54       | -5.57    | -7.40 |
| 14_NMA-methylamine_090_0 °     | -6.81       | -5.97    | -7.55 |
| 14_NMA-methylamine_095_-40 °   | -3.75       | -2.52    | -5.94 |
| 14_NMA-methylamine_095_-20 °   | -6.57       | -6.15    | -7.50 |
| 14_NMA-methylamine_095_-10 °   | -7.15       | -6.86    | -7.72 |
| 14_NMA-methylamine_095_0 °     | -7.34       | -7.11    | -7.81 |
| 14_NMA-methylamine_100_-40 °   | -4.83       | -4.36    | -6.41 |
| 14_NMA-methylamine_100_-20 °   | -6.89       | -6.84    | -7.35 |
| 14_NMA-methylamine_100_-10 °   | -7.32       | -7.32    | -7.49 |
| 14_NMA-methylamine_100_0 °     | -7.45       | -7.49    | -7.54 |
| 14_NMA-methylamine_105_-40 °   | -5.38       | -5.29    | -6.36 |
| 14_NMA-methylamine_105_-20 °   | -6.88       | -6.97    | -6.93 |
| 14_NMA-methylamine_105_-10 °   | -7.20       | -7.30    | -7.02 |
| 14_NMA-methylamine_105_0 °     | -7.29       | -7.41    | -7.06 |
| 14_NMA-methylamine_110_-40 °   | -5.56       | -5.64    | -6.06 |
| 14_NMA-methylamine_110_-20 °   | -6.66       | -6.78    | -6.41 |
| 14_NMA-methylamine_110_-10 °   | -6.90       | -7.01    | -6.46 |
| 14_NMA-methylamine_110_0 °     | -6.97       | -7.08    | -6.50 |
| 14_NMA-methylamine_125_-40 °   | -5.02       | -5.09    | -4.73 |
| 14_NMA-methylamine_125_-20 °   | -5.47       | -5.46    | -4.83 |
| 14_NMA-methylamine_125_-10 °   | -5.58       | -5.55    | -4.86 |
| 14_NMA-methylamine_125_0 °     | -5.61       | -5.58    | -4.89 |
| 14_NMA-methylamine_-20 °_-40 ° | -3.34       | -3.24    | -2.90 |
| 14_NMA-methylamine_-20 °_-20 ° | -3.49       | -3.35    | -2.95 |
| 14_NMA-methylamine_-20 °_-10 ° | -3.53       | -3.40    | -2.99 |
| 14_NMA-methylamine_-20 °_0 °   | -3.55       | -3.42    | -3.02 |
| 14_NMA-methylamine_200_-40 °   | -1.39       | -1.30    | -1.07 |
| 14_NMA-methylamine_200_-20 °   | -1.45       | -1.38    | -1.14 |
| 14_NMA-methylamine_200_-10 °   | -1.48       | -1.41    | -1.17 |
| 14_NMA-methylamine_200_0 °     | -1.49       | -1.42    | -1.19 |

## NMA-NMA

|                     | CCSD(T)/CBS | AMOEBA09 | PBFF  |
|---------------------|-------------|----------|-------|
| 15_NMA-NMA_090_-30° | -4.37       | -2.72    | -5.19 |
| 15_NMA-NMA_090_-10° | -7.61       | -7.60    | -7.31 |
| 15_NMA-NMA_090_0°   | -8.02       | -8.19    | -7.10 |
| 15_NMA-NMA_090_+10° | -7.92       | -8.21    | -6.64 |
| 15_NMA-NMA_095_-30° | -6.02       | -5.24    | -7.59 |
| 15_NMA-NMA_095_-10° | -8.29       | -8.56    | -8.55 |
| 15_NMA-NMA_095_0°   | -8.53       | -8.91    | -8.24 |
| 15_NMA-NMA_095_+10° | -8.40       | -8.85    | -7.80 |
| 15_NMA-NMA_100_-30° | -6.95       | -6.62    | -8.53 |
| 15_NMA-NMA_100_-10° | -8.50       | -8.82    | -8.76 |
| 15_NMA-NMA_100_0°   | -8.63       | -9.01    | -8.41 |
| 15_NMA-NMA_100_+10° | -8.47       | -8.91    | -7.99 |
| 15_NMA-NMA_105_-30° | -7.37       | -7.26    | -8.70 |
| 15_NMA-NMA_105_-10° | -8.40       | -8.66    | -8.50 |
| 15_NMA-NMA_105_0°   | -8.45       | -8.74    | -8.14 |
| 15_NMA-NMA_105_+10° | -8.29       | -8.62    | -7.74 |
| 15_NMA-NMA_110_-30° | -7.46       | -7.41    | -8.48 |
| 15_NMA-NMA_110_-10° | -8.11       | -8.27    | -8.02 |
| 15_NMA-NMA_110_0°   | -8.10       | -8.28    | -7.66 |
| 15_NMA-NMA_110_+10° | -7.93       | -8.14    | -7.29 |
| 15_NMA-NMA_125_-30° | -6.69       | -6.54    | -6.96 |
| 15_NMA-NMA_125_-10° | -6.74       | -6.61    | -6.29 |
| 15_NMA-NMA_125_0°   | -6.66       | -6.53    | -5.99 |
| 15_NMA-NMA_125_+10° | -6.51       | -6.41    | -5.70 |
| 15_NMA-NMA_150_-30° | -4.65       | -4.33    | -4.51 |
| 15_NMA-NMA_150_-10° | -4.50       | -4.20    | -3.99 |
| 15_NMA-NMA_150_0°   | -4.42       | -4.13    | -3.78 |
| 15_NMA-NMA_150_+10° | -4.31       | -4.05    | -3.60 |
| 15_NMA-NMA_200_-30° | -2.14       | -1.89    | -1.93 |
| 15_NMA-NMA_200_-10° | -2.05       | -1.85    | -1.70 |
| 15_NMA-NMA_200_0°   | -2.01       | -1.83    | -1.60 |
| 15_NMA-NMA_200_+10° | -1.95       | -1.79    | -1.50 |

## NMA-water

|                        | CCSD(T)/CBS | AMOEBA09 | PBFF  |
|------------------------|-------------|----------|-------|
| 16_NMA-water_090_-40 ° | -2.67       | -1.19    | -3.81 |
| 16_NMA-water_090_-20 ° | -4.19       | -3.43    | -5.21 |
| 16_NMA-water_090_-10 ° | -4.56       | -4.00    | -5.52 |
| 16_NMA-water_090_0 °   | -4.69       | -4.34    | -5.72 |
| 16_NMA-water_095_-40 ° | -3.60       | -2.57    | -4.60 |
| 16_NMA-water_095_-20 ° | -4.67       | -4.20    | -5.55 |
| 16_NMA-water_095_-10 ° | -4.93       | -4.64    | -5.79 |
| 16_NMA-water_095_0 °   | -5.06       | -4.94    | -5.98 |
| 16_NMA-water_100_-40 ° | -4.05       | -3.29    | -4.77 |
| 16_NMA-water_100_-20 ° | -4.79       | -4.48    | -5.43 |
| 16_NMA-water_100_-10 ° | -5.00       | -4.83    | -5.63 |
| 16_NMA-water_100_0 °   | -5.12       | -5.10    | -5.82 |
| 16_NMA-water_105_-40 ° | -4.19       | -3.59    | -4.65 |
| 16_NMA-water_105_-20 ° | -4.71       | -4.47    | -5.12 |
| 16_NMA-water_105_-10 ° | -4.87       | -4.75    | -5.29 |
| 16_NMA-water_105_0 °   | -4.98       | -5.00    | -5.48 |
| 16_NMA-water_110_-40 ° | -4.15       | -3.64    | -4.39 |
| 16_NMA-water_110_-20 ° | -4.50       | -4.29    | -4.74 |
| 16_NMA-water_110_-10 ° | -4.63       | -4.53    | -4.90 |
| 16_NMA-water_110_0 °   | -4.75       | -4.75    | -5.08 |
| 16_NMA-water_125_-40 ° | -3.51       | -3.12    | -3.42 |
| 16_NMA-water_125_-20 ° | -3.62       | -3.43    | -3.61 |
| 16_NMA-water_125_-10 ° | -3.69       | -3.58    | -3.73 |
| 16_NMA-water_125_0 °   | -6.15       | -3.75    | -3.90 |
| 16_NMA-water_150_-40 ° | -2.33       | -2.05    | -2.14 |
| 16_NMA-water_150_-20 ° | -2.34       | -2.18    | -2.26 |
| 16_NMA-water_150_-10 ° | -2.38       | -2.27    | -2.36 |
| 16_NMA-water_150_0 °   | -2.45       | -2.38    | -2.49 |
| 16_NMA-water_200_-40 ° | -1.08       | -0.96    | -0.83 |
| 16_NMA-water_200_-20 ° | -1.09       | -1.02    | -0.92 |
| 16_NMA-water_200_-10 ° | -1.11       | -1.05    | -0.98 |
| 16_NMA-water_200_0 °   | -1.13       | -1.09    | -1.06 |

Table S3 Optimized monomer coordinates obtained using different methods

|                                        |            |            |            |
|----------------------------------------|------------|------------|------------|
| Method-01-MP2/aug-cc-pVTZ-Single-Water |            |            |            |
| 8                                      | 0.000000   | 0.1182390  | 0.0000000  |
| 1                                      | 0.7581030  | -0.4729560 | 0.0000000  |
| 1                                      | -0.7581030 | -0.4729570 | 0.0000000  |
| Method-02-MP2/cc-pVTZ-Single-Water     |            |            |            |
| 8                                      | 0.0000000  | 0.0000000  | 0.1187280  |
| 1                                      | 0.0000000  | 0.7533060  | -0.4749100 |
| 1                                      | 0.0000000  | -0.7533060 | -0.4749100 |
| Method-03-B3LYP/cc-pVTZ-Single-Water   |            |            |            |
| 8                                      | 0.0000000  | 0.0000000  | 0.1176690  |
| 1                                      | 0.0000000  | 0.7602840  | -0.4706760 |
| 1                                      | 0.0000000  | -0.7602840 | -0.4706760 |
| Method-04-M06-2X/cc-pVTZ-Single-Water  |            |            |            |
| 8                                      | 0.0000000  | 0.0000000  | 0.1168700  |
| 1                                      | 0.0000000  | 0.7605000  | -0.4674790 |
| 1                                      | 0.0000000  | -0.7605000 | -0.4674790 |
| Method-05-AMOEBA09-Single-Water        |            |            |            |
| 8                                      | 0.0000000  | 0.0000000  | 0.1117310  |
| 1                                      | 0.0000000  | -0.7775550 | -0.4469250 |
| 1                                      | 0.0000000  | 0.7775550  | -0.4469250 |
| Method-06-PBFF-Single-Water            |            |            |            |
| 8                                      | 0.0000000  | 0.1171760  | 0.0000000  |
| 1                                      | 0.7569470  | -0.4687050 | 0.0000000  |
| 1                                      | -0.7569470 | -0.4687020 | 0.0000000  |

|                                           |            |            |            |
|-------------------------------------------|------------|------------|------------|
| Method-01-MP2/aug-cc-pVTZ-Single-Methanol |            |            |            |
| 8                                         | 0.7492440  | 0.1222120  | 0.0000100  |
| 1                                         | 1.1366160  | -0.7573500 | 0.0000190  |
| 6                                         | -0.6673070 | -0.0200440 | 0.0000110  |
| 1                                         | -1.0790940 | 0.9847880  | -0.0027190 |
| 1                                         | -1.0236150 | -0.5447240 | -0.8880400 |
| 1                                         | -1.0240130 | -0.5401480 | 0.8905940  |
| Method-02-MP2/cc-pVTZ-Single-Methanol     |            |            |            |
| 8                                         | 0.7480610  | 0.1217700  | 0.0000100  |
| 1                                         | 1.1256390  | -0.7602980 | 0.0000590  |
| 6                                         | -0.6626680 | -0.0195280 | 0.0000110  |
| 1                                         | -1.0785640 | 0.9833130  | -0.0033910 |
| 1                                         | -1.0275160 | -0.5428740 | -0.8855300 |
| 1                                         | -1.0280410 | -0.5371340 | 0.8887180  |
| Method-03-B3LYP/cc-pVTZ-Single-Methanol   |            |            |            |
| 8                                         | 0.7482540  | 0.1218410  | 0.0000100  |
| 1                                         | 1.1434030  | -0.7538140 | 0.0000650  |
| 6                                         | -0.6640360 | -0.0200640 | 0.0000080  |
| 1                                         | -1.0829510 | 0.9848580  | -0.0034850 |
| 1                                         | -1.0308640 | -0.5456500 | -0.8880720 |
| 1                                         | -1.0314050 | -0.5397380 | 0.8913640  |
| Method-04-M06-2X/cc-pVTZ-Single-Methanol  |            |            |            |
| 8                                         | 0.7442370  | 0.1221000  | 0.0000150  |
| 1                                         | 1.1412450  | -0.7501970 | 0.0000590  |
| 6                                         | -0.6609550 | -0.0202700 | 0.0000130  |
| 1                                         | -1.0829130 | 0.9824820  | -0.0039180 |
| 1                                         | -1.0229130 | -0.5470350 | -0.8873100 |
| 1                                         | -1.0235850 | -0.5404290 | 0.8909760  |
| Method-05-AMOEBA09-Single-Methanol        |            |            |            |
| 8                                         | 0.7435000  | 0.1295410  | -0.0000010 |
| 1                                         | 1.1283360  | -0.7581760 | 0.0000100  |
| 6                                         | -0.6604180 | -0.0187050 | 0.0000020  |
| 1                                         | -1.1414510 | 0.9840370  | -0.0000750 |
| 1                                         | -0.9861760 | -0.5750460 | -0.9070310 |
| 1                                         | -0.9861980 | -0.5749150 | 0.9070940  |
| Method-06-PBFF-Single-Methanol            |            |            |            |
| 8                                         | 0.7490720  | 0.1282510  | -0.0000070 |
| 1                                         | 1.1375850  | -0.7515430 | 0.0000630  |
| 6                                         | -0.6685430 | -0.0179880 | -0.0000060 |
| 1                                         | -1.1440500 | 0.9590020  | -0.0008400 |
| 1                                         | -0.9873350 | -0.5635290 | -0.8837000 |
| 1                                         | -0.9875180 | -0.5620060 | 0.8845660  |



|                                              |            |            |            |
|----------------------------------------------|------------|------------|------------|
| Method-01-MP2/aug-cc-pVTZ-Single-Methylamine |            |            |            |
| 7                                            | -0.7492790 | -0.0000370 | -0.1230390 |
| 1                                            | -1.1467100 | -0.8098270 | 0.3355720  |
| 1                                            | -1.1465040 | 0.8098380  | 0.3355980  |
| 6                                            | 0.7073230  | -0.0000420 | 0.0178740  |
| 1                                            | 1.1114440  | 0.8794240  | -0.4794860 |
| 1                                            | 1.0702960  | -0.0044710 | 1.0498640  |
| 1                                            | 1.1124900  | -0.8744500 | -0.4875220 |
| Method-02-MP2/cc-pVTZ-Single-Methylamine     |            |            |            |
| 7                                            | -0.7504700 | -0.0000200 | -0.1263420 |
| 1                                            | -1.1373440 | -0.8059110 | 0.3467460  |
| 1                                            | -1.1371770 | 0.8059210  | 0.3467970  |
| 6                                            | 0.7051570  | -0.0000260 | 0.0180500  |
| 1                                            | 1.1123750  | 0.8765580  | -0.4806580 |
| 1                                            | 1.0714970  | -0.0026600 | 1.0486120  |
| 1                                            | 1.1129970  | -0.8736140 | -0.4854020 |
| Method-03-B3LYP/cc-pVTZ-Single-Methylamine   |            |            |            |
| 7                                            | -0.7504540 | -0.0000380 | -0.1224970 |
| 1                                            | -1.1487010 | -0.8107270 | 0.3352410  |
| 1                                            | -1.1485150 | 0.8107110  | 0.3352940  |
| 6                                            | 0.7063540  | -0.0000400 | 0.0176300  |
| 1                                            | 1.1158120  | 0.8794180  | -0.4806190 |
| 1                                            | 1.0795680  | -0.0044410 | 1.0503860  |
| 1                                            | 1.1168890  | -0.8744550 | -0.4886050 |
| Method-04-M06-2X/cc-pVTZ-Single-Methylamine  |            |            |            |
| 7                                            | -0.7484800 | -0.0000480 | -0.1231210 |
| 1                                            | -1.1443720 | -0.8098840 | 0.3361000  |
| 1                                            | -1.1440750 | 0.8099500  | 0.3360460  |
| 6                                            | 0.7045920  | -0.0000610 | 0.0176700  |
| 1                                            | 1.1133880  | 0.8796890  | -0.4778480 |
| 1                                            | 1.0722060  | -0.0058220 | 1.0498960  |
| 1                                            | 1.1146610  | -0.8732290 | -0.4883660 |
| Method-05-AMOEBA09-Single-Methylamine        |            |            |            |
| 7                                            | -0.7465170 | -0.0000010 | -0.1252510 |
| 1                                            | -1.1565740 | -0.8090030 | 0.3190020  |
| 1                                            | -1.1565720 | 0.8090070  | 0.3189980  |
| 6                                            | 0.7130450  | 0.0000000  | 0.0145100  |
| 1                                            | 1.1340180  | 0.8834520  | -0.4565180 |
| 1                                            | 0.9924590  | 0.0000030  | 1.0647240  |
| 1                                            | 1.1340170  | -0.8834540 | -0.4565140 |
| Method-06-PBFF-Single-Methylamine            |            |            |            |
| 7                                            | -0.7511420 | 0.0000010  | -0.1271860 |
| 1                                            | -1.1496050 | -0.8122250 | 0.3271890  |
| 1                                            | -1.1496270 | 0.8122110  | 0.3272010  |

|   |           |            |            |
|---|-----------|------------|------------|
| 6 | 0.7074100 | 0.0000020  | 0.0117950  |
| 1 | 1.1535570 | 0.8824930  | -0.4481300 |
| 1 | 1.0056450 | -0.0000700 | 1.0615180  |
| 1 | 1.1535650 | -0.8824270 | -0.4482430 |

## Method-01-MP2/aug-cc-pVTZ-Single-NMA

|   |            |            |            |
|---|------------|------------|------------|
| 6 | 1.8250150  | -0.5268630 | -0.0000240 |
| 1 | 1.7556930  | -1.6127860 | 0.0000990  |
| 1 | 2.3778450  | -0.2014920 | 0.8786970  |
| 1 | 2.3776180  | -0.2016800 | -0.8789590 |
| 6 | 0.4794890  | 0.1576480  | 0.0000400  |
| 8 | 0.3629110  | 1.3791740  | 0.0000100  |
| 7 | -0.6055080 | -0.6604430 | 0.0000040  |
| 1 | -0.4736800 | -1.6551810 | 0.0001890  |
| 6 | -1.9442960 | -0.1053670 | -0.0000230 |
| 1 | -2.1009880 | 0.5143720  | 0.8811290  |
| 1 | -2.1006600 | 0.5151400  | -0.8806930 |
| 1 | -2.6618090 | -0.9211760 | -0.0005270 |

## Method-02-MP2/cc-pVTZ-Single-NMA

|   |            |            |            |
|---|------------|------------|------------|
| 6 | -1.8058250 | -0.5611080 | 0.0023500  |
| 1 | -1.7090710 | -1.6442440 | -0.0078120 |
| 1 | -2.3741550 | -0.2441540 | -0.8684460 |
| 1 | -2.3623040 | -0.2591820 | 0.8861250  |
| 6 | -0.4807710 | 0.1652740  | -0.0008110 |
| 8 | -0.4137540 | 1.3869260  | -0.0004750 |
| 7 | 0.6187230  | -0.6389970 | -0.0091420 |
| 1 | 0.4825240  | -1.6323360 | 0.0170930  |
| 6 | 1.9613920  | -0.1027800 | 0.0034400  |
| 1 | 1.8761590  | 0.9715080  | -0.1258190 |
| 1 | 2.4649990  | -0.3051800 | 0.9476640  |
| 1 | 2.5520480  | -0.5171570 | -0.8108790 |

## Method-03-B3LYP/cc-pVTZ-Single-NMA

|   |            |            |            |
|---|------------|------------|------------|
| 6 | -1.8117930 | -0.5656600 | 0.0000020  |
| 1 | -1.7184620 | -1.6514350 | -0.0001280 |
| 1 | -2.3782910 | -0.2571710 | -0.8778440 |
| 1 | -2.3781480 | -0.2573890 | 0.8780220  |
| 6 | -0.4831590 | 0.1665240  | -0.0000070 |
| 8 | -0.4252010 | 1.3839230  | -0.0000030 |
| 7 | 0.6233390  | -0.6304140 | 0.0000010  |
| 1 | 0.4945890  | -1.6262200 | -0.0000460 |
| 6 | 1.9735220  | -0.1019600 | 0.0000050  |
| 1 | 1.9001080  | 0.9820470  | 0.0000050  |
| 1 | 2.5235150  | -0.4208710 | 0.8873360  |
| 1 | 2.5235020  | -0.4208670 | -0.8873340 |

## Method-04-M06-2X/cc-pVTZ-Single-NMA

|   |            |            |            |
|---|------------|------------|------------|
| 6 | -1.8089920 | -0.5575080 | 0.0020430  |
| 1 | -1.7163040 | -1.6415850 | -0.0191770 |
| 1 | -2.3791850 | -0.2267590 | -0.8637590 |
| 1 | -2.3588670 | -0.2592870 | 0.8926210  |

|                               |            |            |            |
|-------------------------------|------------|------------|------------|
| 6                             | -0.4805620 | 0.1642640  | -0.0009190 |
| 8                             | -0.4158550 | 1.3763050  | -0.0003980 |
| 7                             | 0.6197480  | -0.6350020 | -0.0079180 |
| 1                             | 0.4887090  | -1.6296780 | 0.0169420  |
| 6                             | 1.9640320  | -0.1000090 | 0.0029990  |
| 1                             | 1.8881090  | 0.9715610  | -0.1588980 |
| 1                             | 2.4580510  | -0.2771400 | 0.9591820  |
| 1                             | 2.5612210  | -0.5430250 | -0.7930410 |
| Method-05-AMOEBA09-Single-NMA |            |            |            |
| 6                             | 1.8171140  | -0.5781820 | 0.0000070  |
| 1                             | 1.7125020  | -1.6846820 | 0.0002260  |
| 1                             | 2.4044280  | -0.2860200 | 0.8979030  |
| 1                             | 2.4042670  | -0.2863490 | -0.8981020 |
| 6                             | 0.4932670  | 0.1648050  | 0.0000000  |
| 8                             | 0.4643280  | 1.3839520  | -0.0000080 |
| 7                             | -0.6377130 | -0.6180240 | -0.0000050 |
| 1                             | -0.5754400 | -1.6202660 | -0.0000720 |
| 6                             | -1.9919330 | -0.0916830 | 0.0000070  |
| 1                             | -2.0010150 | 1.0208390  | -0.0015740 |
| 1                             | -2.5535540 | -0.4305890 | -0.8978850 |
| 1                             | -2.5525060 | -0.4280170 | 0.8995180  |
| Method-06-PBFF-Single-NMA     |            |            |            |
| 6                             | 1.8192170  | -0.5644000 | -0.0000840 |
| 1                             | 1.6596930  | -1.6483920 | 0.0001700  |
| 1                             | 2.4028470  | -0.3027210 | 0.8887120  |
| 1                             | 2.4025330  | -0.3030920 | -0.8891940 |
| 6                             | 0.4854770  | 0.1716280  | 0.0000010  |
| 8                             | 0.4271210  | 1.3959900  | 0.0001240  |
| 7                             | -0.6246210 | -0.6306980 | -0.0000700 |
| 1                             | -0.4996480 | -1.6330390 | -0.0001710 |
| 6                             | -1.9773200 | -0.1022470 | 0.0000410  |
| 1                             | -1.9506710 | 0.9933760  | -0.0011830 |
| 1                             | -2.5122780 | -0.4455220 | -0.8919330 |
| 1                             | -2.5113440 | -0.4435350 | 0.8933400  |

Table S4 Vibration frequencies of optimized monomers obtained using various methods

| Water                       |          |                   |              |                |                 |           |      |
|-----------------------------|----------|-------------------|--------------|----------------|-----------------|-----------|------|
| Assignment                  | Mode Nr. | EXP. <sup>1</sup> | MP2/ cc-pVTZ | B3LYP/ cc-pVTZ | M06-2X/ cc-pVTZ | AMOEBAA09 | PBFF |
| O-H stretch                 | 3        | 3756              | 3975         | 3901           | 3978            | 3753      | 3918 |
| H-CH, stretch               | 2        | 3657              | 3855         | 3800           | 3874            | 3655      | 3855 |
| CH, asym stretch            | 1        | 1595              | 1652         | 1639           | 1624            | 1592      | 1624 |
| RMSE of vibration frequency |          |                   | 174          | 120            | 180             | 3         | 149  |

<sup>1</sup> Results from the reference (T. A. Halgren, *J. Comput. Chem.*, 1996, **17**, 553–586.)

| Methanol                    |          |                   |              |                |                 |           |      |
|-----------------------------|----------|-------------------|--------------|----------------|-----------------|-----------|------|
| Assignment                  | Mode Nr. | EXP. <sup>2</sup> | MP2/ cc-pVTZ | B3LYP/ cc-pVTZ | M06-2X/ cc-pVTZ | AMOEBAA09 | PBFF |
| O-H stretch                 | 12       | 3682              | 3882         | 3830           | 3911            | 3909      | 3847 |
| H-CH, stretch               | 11       | 2999              | 3182         | 3101           | 3132            | 3170      | 3089 |
| CH, asym stretch            | 10       | 2970              | 3120         | 3027           | 3083            | 3165      | 3083 |
| CH, sym stretch             | 9        | 2844              | 3052         | 2985           | 3027            | 3045      | 2970 |
| H-C-H scissor               | 8        | 1478              | 1537         | 1512           | 1523            | 1541      | 1685 |
| CH, twist                   | 7        | 1465              | 1522         | 1496           | 1504            | 1526      | 1533 |
| CH, umbrella bend           | 6        | 1454              | 1497         | 1482           | 1489            | 1517      | 1521 |
| C-O-H bend (+ CH, rock)     | 5        | 1334              | 1388         | 1376           | 1380            | 1379      | 1372 |
| CH, rock                    | 4        | 1145              | 1188         | 1171           | 1184            | 1201      | 1180 |
| C-O stretch                 | 3        | 1074              | 1105         | 1084           | 1120            | 1101      | 1149 |
| CH, rock (+ COH bend)       | 2        | 1034              | 1070         | 1048           | 1075            | 1083      | 1063 |
| C-O torsion                 | 1        | 272               | 310          | 308            | 335             | 287       | 336  |
| RMSE of vibration frequency |          |                   | 114          | 72             | 105             | 122       | 104  |

<sup>2</sup> Results from the reference (A. Serrallach, R. Meyer and H. Günthard, *J. Mol. Spectrosc.*, 1974, **52**, 94–129.)

| Methylamine                 |          |                     |              |                |                 |         |      |
|-----------------------------|----------|---------------------|--------------|----------------|-----------------|---------|------|
| Assignment                  | Mode Nr. | EXP. <sup>3,4</sup> | MP2/ cc-pVTZ | B3LYP/ cc-pVTZ | M06-2X/ cc-pVTZ | AMOEB09 | PBFF |
| NH, asym stretch            | 15       | 3424                | 3632         | 3567           | 3614            | 3634    | 3608 |
| NH, sym stretch             | 14       | 3360                | 3539         | 3492           | 3533            | 3569    | 3542 |
| CH, asym stretch            | 13       | 2985                | 3171         | 3087           | 3123            | 3167    | 3159 |
| CH, sym stretch             | 12       | 2962                | 3132         | 3054           | 3087            | 3161    | 3151 |
| H-CH, stretch               | 11       | 2820                | 3042         | 2960           | 3012            | 3058    | 3059 |
| H-N-H scissor               | 10       | 1623                | 1666         | 1665           | 1656            | 1661    | 1630 |
| H-CH, wag                   | 9        | 1476                | 1541         | 1519           | 1525            | 1522    | 1552 |
| H-C-H scissor               | 8        | 1474                | 1520         | 1498           | 1505            | 1515    | 1434 |
| CH, umbrella bend           | 7        | 1430                | 1466         | 1459           | 1458            | 1493    | 1426 |
| NH, twist                   | 6        | 1337                | 1360         | 1350           | 1346            | 1233    | 1204 |
| H-CH, rock in Cs plane      | 5        | 1130                | 1191         | 1172           | 1177            | 1204    | 1166 |
| N-C stretch                 | 4        | 1044                | 1083         | 1054           | 1087            | 1065    | 1070 |
| CH, twist                   | 3        | 995                 | 983          | 975            | 968             | 1044    | 980  |
| NH, wag                     | 2        | 780                 | 868          | 841            | 846             | 854     | 839  |
| C-N torsion                 | 1        | 264                 | 311          | 300            | 297             | 310     | 381  |
| RMSE of vibration frequency |          |                     | 119          | 77             | 101             | 130     | 125  |

<sup>3</sup> Results from the reference (H. Wolff and H. Ludwig, Ber. Bunsenges. *Phys. Chem.*, 1966, **70**, 474–485.)

<sup>4</sup> Results from the reference (A. Y. Hirakawa, M. Tsuboi and T. Shimanouchi, *J. Chem.Phys.*, 1972, **57**, 1236–1247.)

| N-methylacetamide                             |          |                   |              |                |                 |          |      |
|-----------------------------------------------|----------|-------------------|--------------|----------------|-----------------|----------|------|
| Assignment                                    | Mode Nr. | EXP. <sup>5</sup> | MP2/ cc-pVTZ | B3LYP/ cc-pVTZ | M06-2X/ cc-pVTZ | AMOEBA09 | PBFF |
| NH s                                          | 30       | 3498              | 3698         | 3646           | 3693            | 3680     | 3650 |
| CCH <sub>3</sub> as                           | 29       | 3008              | 3202         | 3140           | 3169            | 2985     | 3097 |
| CCH <sub>3</sub> as                           | 28       | 3008              | 3189         | 3116           | 3157            | 2980     | 3097 |
| NCH <sub>3</sub> as                           | 27       | 2973              | 3188         | 3114           | 3156            | 2977     | 3094 |
| NCH <sub>3</sub> as                           | 26       | 2973              | 3155         | 3069           | 3117            | 2973     | 3094 |
| CCH <sub>3</sub> ss                           | 25       | 2958              | 3092         | 3043           | 3073            | 2886     | 2992 |
| NCH <sub>3</sub> ss                           | 24       | 2915              | 3079         | 3024           | 3057            | 2884     | 2990 |
| Amide I                                       | 23       | 1707              | 1770         | 1754           | 1803            | 1680     | 1660 |
| Amide II                                      | 22       | 1511              | 1578         | 1561           | 1576            | 1649     | 1638 |
| NCH <sub>3</sub> ab                           | 21       | 1472              | 1523         | 1503           | 1513            | 1541     | 1557 |
| NCH <sub>3</sub> ab                           | 20       | 1446              | 1514         | 1497           | 1505            | 1460     | 1488 |
| CCH <sub>3</sub> ab                           | 19       | 1432              | 1501         | 1488           | 1492            | 1454     | 1486 |
| CCH <sub>3</sub> ab                           | 18       | 1432              | 1487         | 1472           | 1476            | 1440     | 1480 |
| NCH <sub>3</sub> sb                           | 17       | 1419              | 1444         | 1440           | 1445            | 1418     | 1462 |
| CCH <sub>3</sub> sb                           | 16       | 1370              | 1402         | 1399           | 1399            | 1417     | 1456 |
| Amide III                                     | 15       | 1266              | 1285         | 1269           | 1284            | 1299     | 1277 |
| NCH <sub>3</sub> r CN s NH ipb                | 14       | 1168              | 1177         | 1169           | 1179            | 1113     | 1157 |
| NCH <sub>3</sub> r                            | 13       | –                 | 1165         | 1153           | 1160            | 1080     | 1137 |
| NCH <sub>3</sub> s CCH <sub>3</sub> r         | 12       | 1089              | 1128         | 1102           | 1128            | 1050     | 1045 |
| CCH <sub>3</sub> r                            | 11       | 1037              | 1056         | 1054           | 1059            | 934      | 1024 |
| CCH <sub>3</sub> r CC s NCH <sub>3</sub> s    | 10       | 980               | 1005         | 993            | 1007            | 920      | 960  |
| NCH <sub>3</sub> r CCH <sub>3</sub> s CO–NH s | 9        | 857               | 878          | 866            | 885             | 798      | 790  |
| CO ipb CC s                                   | 8        | 658               | 638          | 635            | 641             | 607      | 596  |
| CO opb CCH <sub>3</sub> r                     | 7        | 619               | 630          | 622            | 635             | 597      | 587  |

|                                 |   |     |     |     |     |     |     |
|---------------------------------|---|-----|-----|-----|-----|-----|-----|
| CO NH opb                       | 6 | 439 | 434 | 452 | 443 | 472 | 430 |
| CNC d CO ipb CCH <sub>3</sub> r | 5 | 429 | 426 | 433 | 439 | 340 | 422 |
| CNC d                           | 4 | 279 | 290 | 287 | 298 | 306 | 259 |
| CNC d NH opb                    | 3 | –   | 161 | 167 | 171 | 237 | 147 |
| CCH <sub>3</sub> d              | 2 | –   | 48  | 71  | 85  | 87  | 77  |
| NCH <sub>3</sub> d              | 1 | –   | 20  | 54  | 48  | 27  | 56  |
| RMSE of vibration frequency     |   |     | 101 | 66  | 89  | 63  | 71  |

Notes: In the vibrations assignment column here and thereafter s is for stretch, as = asymmetric stretch, ss = symmetric stretch, d = deformation, r = rocking, ab = asymmetric bend, sb = symmetric bend, ipb = in-plane bend, opb = out-of-plane bend.

<sup>5</sup>The experimental IR spectra were obtained from reference (N. Tukachev, V. Bataev and I. Godunov, *Comput. Theor. Chem.*,2017, **1113**, 82–93.)



Table S5 Using different methods to predict the interaction energies of the equilibrium structure in S66×8 and S66 data set

| hydrogen bond dimer        | CCSD(T)/CBS |       | MP2/cc-pVTZ |       | B3LYP-D3/cc-pVTZ |       | M06-2X-D3/cc-pVTZ |       | AMOEBA09 |       | PBFF  |       |
|----------------------------|-------------|-------|-------------|-------|------------------|-------|-------------------|-------|----------|-------|-------|-------|
|                            | S66         | S66×8 | S66         | S66×8 | S66              | S66×8 | S66               | S66×8 | S66      | S66×8 | S66   | S66×8 |
| water ···water             | -5.01       | -4.89 | -4.47       | -4.49 | -5.24            | -5.16 | -5.08             | -5.07 | -5.15    | -5.08 | -5.20 | -5.03 |
| water ···methanol          | -5.70       | -5.57 | -4.85       | -4.88 | -5.69            | -5.85 | -5.47             | -5.46 | -5.70    | -5.68 | -5.36 | -5.25 |
| water ···methylamine       | -7.04       | -6.88 | -6.03       | -6.06 | -7.09            | -7.47 | -6.53             | -6.54 | -8.45    | -8.25 | -6.52 | -6.26 |
| water ···NMA               | -8.22       | -8.08 | -6.85       | -6.88 | -8.19            | -8.48 | -8.26             | -8.22 | -8.11    | -8.05 | -8.18 | -8.07 |
| methanol ···methanol       | -5.85       | -5.75 | -5.12       | -5.14 | -5.99            | -6.00 | -5.64             | -5.63 | -5.50    | -5.52 | -6.12 | -6.05 |
| methanol ···methylamine    | -7.67       | -7.54 | -6.87       | -6.88 | -8.01            | -8.11 | -7.38             | -7.37 | -7.99    | -7.95 | -7.62 | -7.46 |
| methanol ···NMA            | -8.34       | -8.22 | -7.17       | -7.18 | -8.66            | -8.70 | -8.40             | -8.38 | -8.08    | -8.07 | -8.41 | -8.36 |
| methanol ···water          | -5.09       | -5.00 | -4.66       | -4.67 | -5.44            | -5.21 | -5.22             | -5.20 | -4.81    | -4.81 | -5.71 | -5.60 |
| methylamine ···methanol    | -3.11       | -3.04 | -2.55       | -2.57 | -3.32            | -3.30 | -2.81             | -2.80 | -2.90    | -2.89 | -3.18 | -3.15 |
| methylamine ···methylamine | -4.22       | -4.15 | -3.65       | -3.66 | -4.27            | -4.26 | -4.16             | -4.14 | -3.02    | -3.13 | -4.10 | -4.07 |
| methylamine ···NMA         | -5.48       | -5.41 | -4.64       | -4.65 | -5.67            | -5.67 | -5.67             | -5.62 | -4.72    | -4.77 | -5.82 | -5.82 |
| methylamine ···water       | -7.40       | -7.25 | -6.47       | -6.49 | -7.43            | -7.72 | -7.18             | -7.17 | -7.14    | -7.17 | -6.66 | -6.48 |
| NMA ···methanol            | -6.28       | -6.18 | -5.63       | -5.63 | -6.40            | -6.30 | -6.22             | -6.21 | -6.12    | -6.17 | -6.51 | -6.48 |
| NMA ···methylamine         | -7.56       | -7.45 | -7.00       | -7.00 | -7.83            | -7.75 | -7.38             | -7.38 | -7.46    | -7.49 | -7.59 | -7.54 |
| NMA ···NMA                 | -8.72       | -8.63 | -7.65       | -7.65 | -8.97            | -9.02 | -8.59             | -8.58 | -9.02    | -9.01 | -8.43 | -8.41 |
| NMA ···water               | -5.20       | -5.12 | -4.86       | -4.87 | -5.48            | -5.15 | -5.37             | -5.36 | -5.09    | -5.10 | -5.89 | -5.82 |

Table S6 The hydrogen bond length(Å) of 16 optimized hydrogen bond complexes by different methods

| hydrogen bond dimer       | Reference | MP2/cc-pVTZ | B3LYP-D3/cc-pVTZ | M06-2X-D3/cc-pVTZ | AMOEBA09 | PBFF  |
|---------------------------|-----------|-------------|------------------|-------------------|----------|-------|
| water···water             | 1.963     | 1.946       | 1.943            | 1.943             | 1.936    | 1.838 |
| water···methanol          | 1.919     | 1.901       | 1.907            | 1.919             | 1.900    | 1.858 |
| water···methylamine       | 1.962     | 1.925       | 1.921            | 1.939             | 1.891    | 1.874 |
| water···NMA               | 1.862     | 1.863       | 1.873            | 1.863             | 1.825    | 1.847 |
| methanol···methanol       | 1.906     | 1.875       | 1.886            | 1.917             | 1.915    | 1.868 |
| methanol···methylamine    | 1.939     | 1.887       | 1.895            | 1.913             | 1.909    | 1.861 |
| methanol···NMA            | 1.855     | 1.830       | 1.846            | 1.863             | 1.838    | 1.869 |
| methanol···water          | 1.952     | 1.918       | 1.920            | 1.926             | 1.953    | 1.852 |
| methylamine···methanol    | 2.200     | 2.186       | 1.895            | 1.908             | 1.909    | 2.197 |
| methylamine···methylamine | 2.244     | 2.194       | 2.211            | 2.223             | 2.248    | 2.204 |
| methylamine···NMA         | 2.204     | 2.209       | 2.255            | 2.228             | 2.182    | 2.231 |
| methylamine···water       | 1.941     | 1.925       | 1.921            | 1.930             | 1.892    | 1.873 |
| NMA···methanol            | 1.990     | 1.955       | 1.986            | 2.006             | 2.055    | 2.004 |
| NMA···methylamine         | 2.049     | 2.004       | 2.023            | 2.061             | 2.046    | 2.012 |
| NMA···NMA                 | 1.947     | 1.909       | 1.932            | 1.970             | 1.951    | 2.003 |
| NMA···water               | 2.053     | 2.020       | 2.035            | 2.046             | 2.108    | 1.998 |
| RMSE                      |           | 0.032       | 0.081            | 0.075             | 0.080    | 0.061 |

Table S7 Interaction energies(kcal·mol<sup>-1</sup>) of 16 optimized hydrogen bond complexes by using different methods

| hydrogen bond dimer       | Reference | MP2/cc-pVTZ | B3LYP-D3/cc-pVTZ | M06-2X-D3/cc-pVTZ | AMOEBA09 | PBFF  |
|---------------------------|-----------|-------------|------------------|-------------------|----------|-------|
| water···water             | -5.01     | -4.40       | -5.24            | -5.09             | -4.99    | -5.59 |
| water···methanol          | -5.70     | -4.76       | -5.66            | -5.57             | -5.89    | -5.84 |
| water···methylamine       | -7.04     | -6.14       | -7.30            | -6.98             | -8.53    | -7.02 |
| water···NMA               | -8.22     | -7.39       | -8.06            | -8.38             | -8.22    | -8.19 |
| methanol···methanol       | -5.85     | -5.11       | -6.03            | -6.04             | -5.78    | -6.58 |
| methanol···methylamine    | -7.67     | -6.96       | -8.12            | -7.68             | -8.35    | -8.29 |
| methanol···NMA            | -8.34     | -7.18       | -8.65            | -8.55             | -8.25    | -8.68 |
| methanol···water          | -5.09     | -4.58       | -5.44            | -5.22             | -4.83    | -6.18 |
| methylamine···methanol    | -3.11     | -2.44       | -8.12            | -7.64             | -8.35    | -3.35 |
| methylamine···methylamine | -4.22     | -3.61       | -4.26            | -4.22             | -3.76    | -4.37 |
| methylamine···NMA         | -5.48     | -4.62       | -5.61            | -5.88             | -5.12    | -6.06 |
| methylamine···water       | -7.40     | -6.14       | -7.30            | -7.31             | -8.53    | -7.34 |
| NMA···methanol            | -6.28     | -5.55       | -6.36            | -6.35             | -6.42    | -6.82 |
| NMA···methylamine         | -7.56     | -6.97       | -7.81            | -7.41             | -8.10    | -8.09 |
| NMA···NMA                 | -8.72     | -7.80       | -9.06            | -8.63             | -9.27    | -9.41 |
| NMA···water               | -5.20     | -4.60       | -5.25            | -5.25             | -5.16    | -6.11 |
| RMSE                      |           | 0.82        | 1.27             | 1.14              | 1.43     | 0.55  |

Table S8 Optimized trimer coordinates obtained via the MP2/cc-pVDZ method

## Trimer01-Water-Water-Water

|   |            |            |            |
|---|------------|------------|------------|
| 8 | 0.6066670  | 1.4760580  | 0.1196780  |
| 1 | -0.3080240 | 1.1242240  | 0.1058040  |
| 1 | 0.6544300  | 1.9623920  | -0.7139190 |
| 8 | 0.9849240  | -1.2621250 | -0.1068630 |
| 1 | 1.1361880  | -0.2944880 | -0.0642520 |
| 1 | 1.3251480  | -1.5622030 | 0.7460070  |
| 8 | -1.5848570 | -0.2042980 | -0.0931350 |
| 1 | -2.0270390 | -0.4752390 | 0.7217180  |
| 1 | -0.8345700 | -0.8317660 | -0.1527990 |

## Trimer02-Water-Water-Methanol

|   |            |            |            |
|---|------------|------------|------------|
| 8 | -1.4534410 | -1.2940390 | 0.2111520  |
| 1 | -0.5254930 | -1.1749520 | -0.0837160 |
| 1 | -1.8648050 | -1.7095660 | -0.5578960 |
| 8 | -1.1506020 | 1.4596950  | 0.1328360  |
| 1 | -1.7405240 | 1.8301310  | -0.5363700 |
| 1 | -1.5251030 | 0.5668760  | 0.2866760  |
| 8 | 0.9272550  | -0.1614740 | -0.6242000 |
| 1 | 0.3375680  | 0.6103050  | -0.4860760 |
| 6 | 1.9823900  | -0.0247820 | 0.3186050  |
| 1 | 2.6147640  | -0.9226260 | 0.2466450  |
| 1 | 2.6127180  | 0.8576170  | 0.1037700  |
| 1 | 1.6108380  | 0.0574520  | 1.3570400  |

## Trimer03-Water-Water-Methylamine

|   |            |            |            |
|---|------------|------------|------------|
| 8 | 0.9911740  | 1.4835890  | 0.3122320  |
| 1 | 0.0501150  | 1.2676520  | 0.1031560  |
| 1 | 1.2323640  | 2.0893290  | -0.4007010 |
| 8 | 1.8476800  | -1.1316250 | -0.2794080 |
| 1 | 1.6520680  | -0.1907600 | -0.0942840 |
| 1 | 2.1440610  | -1.4361860 | 0.5875520  |
| 7 | -1.5272610 | 0.4297150  | -0.3750080 |
| 1 | -1.4881660 | 0.2327020  | -1.3791270 |
| 1 | -2.4415960 | 0.8653030  | -0.2281660 |
| 6 | -1.4742250 | -0.8539070 | 0.3515990  |
| 1 | -1.5786810 | -0.6537860 | 1.4297880  |
| 1 | -2.2601630 | -1.5735310 | 0.0556340  |
| 1 | -0.4846590 | -1.3009920 | 0.1790170  |

## Trimer04-Water-Water-NMA

|   |           |            |            |
|---|-----------|------------|------------|
| 8 | 2.3031300 | 1.4631570  | -0.3031610 |
| 1 | 2.3479480 | 2.1980570  | 0.3225880  |
| 1 | 1.3344710 | 1.3516210  | -0.4159360 |
| 8 | 2.8982800 | -0.9848460 | 0.9138420  |
| 1 | 3.4915390 | -1.3544090 | 0.2472230  |

|                                     |            |            |            |
|-------------------------------------|------------|------------|------------|
| 1                                   | 2.7500470  | -0.0849830 | 0.5562020  |
| 6                                   | 0.0648280  | -1.2851090 | -0.8456260 |
| 1                                   | -0.4391590 | -2.2636600 | -0.8474850 |
| 1                                   | 0.9737290  | -1.3359840 | -0.2231420 |
| 1                                   | 0.3723790  | -1.0375940 | -1.8742350 |
| 6                                   | -0.8144870 | -0.1645910 | -0.3321790 |
| 8                                   | -0.4300630 | 1.0134210  | -0.2944830 |
| 7                                   | -2.0583230 | -0.5306440 | 0.0840500  |
| 1                                   | -2.3040520 | -1.5122030 | 0.0462330  |
| 6                                   | -3.0097360 | 0.4169010  | 0.6357280  |
| 1                                   | -2.5475250 | 1.4111610  | 0.5750940  |
| 1                                   | -3.9483390 | 0.4173780  | 0.0577990  |
| 1                                   | -3.2371830 | 0.1880650  | 1.6901840  |
| Trimer05-Water-Methanol-Methanol    |            |            |            |
| 8                                   | 0.0537340  | 1.9472980  | 0.0305600  |
| 1                                   | 0.6605400  | 1.3066100  | 0.4589070  |
| 1                                   | 0.6194560  | 2.3788770  | -0.6228390 |
| 8                                   | -1.1555730 | -0.4485640 | -0.5011400 |
| 1                                   | -0.9265660 | 0.5053010  | -0.4996940 |
| 6                                   | -2.4048180 | -0.5681660 | 0.1669830  |
| 1                                   | -2.6370390 | -1.6403910 | 0.2521890  |
| 1                                   | -2.3816540 | -0.1344250 | 1.1839620  |
| 1                                   | -3.2201340 | -0.0833950 | -0.4004920 |
| 8                                   | 1.2878740  | -0.4239610 | 0.7272200  |
| 1                                   | 0.4012670  | -0.6989300 | 0.4063800  |
| 6                                   | 2.1829740  | -0.7318320 | -0.3322480 |
| 1                                   | 3.1906160  | -0.4136600 | -0.0236480 |
| 1                                   | 2.2152470  | -1.8152560 | -0.5470880 |
| 1                                   | 1.9210510  | -0.2029290 | -1.2692010 |
| Trimer06-Water-Methanol-Methylamine |            |            |            |
| 8                                   | -0.0078010 | 1.8676820  | -0.0468080 |
| 1                                   | 0.7403570  | 1.3056390  | 0.2721410  |
| 1                                   | 0.3624850  | 2.2875180  | -0.8343900 |
| 8                                   | -1.5582590 | -0.3300800 | -0.6899040 |
| 1                                   | -1.0936810 | 0.5198980  | -0.5375750 |
| 6                                   | -2.2277050 | -0.6132910 | 0.5206290  |
| 1                                   | -2.7539210 | -1.5743870 | 0.4033250  |
| 1                                   | -1.5380690 | -0.7114540 | 1.3847130  |
| 1                                   | -2.9812950 | 0.1549870  | 0.7831220  |
| 7                                   | 1.8821230  | -0.0855250 | 0.6486960  |
| 1                                   | 1.5077180  | -0.5608710 | 1.4748160  |
| 1                                   | 2.8734890  | 0.0586460  | 0.8577880  |
| 6                                   | 1.7484770  | -0.9845920 | -0.5133730 |
| 1                                   | 2.2073820  | -0.5005550 | -1.3904400 |
| 1                                   | 2.2268120  | -1.9725990 | -0.3794700 |

|                                        |            |            |            |
|----------------------------------------|------------|------------|------------|
| 1                                      | 0.6777040  | -1.1216660 | -0.7247400 |
| Trimer07-Water-Methanol-NMA            |            |            |            |
| 8                                      | -1.5623820 | 1.8704420  | -0.2977230 |
| 1                                      | -0.6163090 | 1.6239730  | -0.3959600 |
| 1                                      | -1.5135840 | 2.6310160  | 0.2963520  |
| 8                                      | -2.5473890 | -0.4006150 | 0.9058110  |
| 1                                      | -2.2275450 | 0.4578190  | 0.5540890  |
| 6                                      | -3.5928980 | -0.7887050 | 0.0368180  |
| 1                                      | -3.9990470 | -1.7472290 | 0.3984450  |
| 1                                      | -4.4231010 | -0.0558620 | 0.0171770  |
| 1                                      | -3.2519210 | -0.9371310 | -1.0076480 |
| 6                                      | 0.2318060  | -1.1687130 | -0.7482280 |
| 1                                      | 0.5887850  | -2.2098590 | -0.7414780 |
| 1                                      | -0.0769250 | -0.9015380 | -1.7715870 |
| 1                                      | -0.6532260 | -1.0746690 | -0.0963830 |
| 6                                      | 1.2819530  | -0.1770450 | -0.2949620 |
| 8                                      | 1.0703800  | 1.0445860  | -0.2669340 |
| 7                                      | 2.4776380  | -0.7092900 | 0.0797820  |
| 1                                      | 2.5827080  | -1.7158570 | 0.0465840  |
| 6                                      | 3.5791810  | 0.1023880  | 0.5650090  |
| 1                                      | 3.2556410  | 1.1504590  | 0.5130370  |
| 1                                      | 3.8297390  | -0.1473830 | 1.6093240  |
| 1                                      | 4.4761920  | -0.0315520 | -0.0614860 |
| Trimer08-Water-Methylamine-Methylamine |            |            |            |
| 8                                      | 0.3631680  | 2.0494470  | -0.0173230 |
| 1                                      | 0.9431290  | 1.3232570  | 0.3097840  |
| 1                                      | 0.7286910  | 2.2093420  | -0.8972100 |
| 7                                      | -1.5730630 | -0.2824420 | -0.6180820 |
| 1                                      | -2.1270840 | -0.0995180 | -1.4585390 |
| 1                                      | -1.0657850 | 0.5930970  | -0.4388200 |
| 6                                      | -2.4938150 | -0.5156560 | 0.4979830  |
| 1                                      | -1.9115130 | -0.6536840 | 1.4243410  |
| 1                                      | -3.2262430 | 0.2953690  | 0.6877920  |
| 1                                      | -3.0608050 | -1.4467640 | 0.3292490  |
| 7                                      | 1.8403360  | -0.2815570 | 0.6882150  |
| 1                                      | 1.3147290  | -0.7504230 | 1.4312010  |
| 1                                      | 2.8062420  | -0.2566830 | 1.0256460  |
| 6                                      | 1.7634410  | -1.1087920 | -0.5294960 |
| 1                                      | 2.3250830  | -0.6098410 | -1.3362900 |
| 1                                      | 2.1732740  | -2.1298860 | -0.4115210 |
| 1                                      | 0.7062640  | -1.1751610 | -0.8289010 |
| Trimer09-Water-Methylamine-NMA         |            |            |            |
| 8                                      | 1.2702380  | -0.6435910 | 1.9638720  |
| 1                                      | 1.7362410  | -0.6705920 | 1.0932800  |
| 1                                      | 1.3148410  | -1.5568910 | 2.2741740  |

|                        |            |            |            |
|------------------------|------------|------------|------------|
| 7                      | 2.1118570  | -0.2990100 | -0.6837510 |
| 1                      | 1.2031050  | 0.1519960  | -0.8375810 |
| 1                      | 2.1602050  | -1.0454250 | -1.3822640 |
| 6                      | 3.1820930  | 0.6757470  | -0.9430000 |
| 1                      | 4.1605810  | 0.1935890  | -0.7910380 |
| 1                      | 3.1660900  | 1.1123930  | -1.9591490 |
| 1                      | 3.1002310  | 1.4976230  | -0.2146850 |
| 6                      | -1.2035420 | -1.7716210 | -0.3112970 |
| 1                      | -0.9712150 | -2.0838390 | -1.3423240 |
| 1                      | -2.0277780 | -2.4101070 | 0.0437450  |
| 1                      | -0.3216690 | -1.9124390 | 0.3287680  |
| 6                      | -1.6798540 | -0.3244550 | -0.3329100 |
| 8                      | -2.6575700 | 0.0412040  | -0.9816130 |
| 7                      | -0.8964180 | 0.5384380  | 0.3951330  |
| 1                      | -0.2628070 | 0.1336290  | 1.0926530  |
| 6                      | -1.3460280 | 1.9080700  | 0.5836220  |
| 1                      | -1.6481930 | 2.3295340  | -0.3861400 |
| 1                      | -2.2151700 | 1.9747510  | 1.2629670  |
| 1                      | -0.5198890 | 2.5024350  | 1.0013620  |
| Trimer10-Water-NMA-NMA |            |            |            |
| 8                      | -0.1675850 | 2.1344160  | -1.2625440 |
| 1                      | -0.1390090 | 2.1568130  | -2.2282940 |
| 1                      | 0.7110740  | 1.7609040  | -1.0397960 |
| 6                      | -0.6922880 | -1.3711860 | -0.9668730 |
| 1                      | -0.1515420 | -0.5033440 | -1.3694460 |
| 1                      | -0.9442890 | -2.0727350 | -1.7770220 |
| 1                      | -0.0364880 | -1.9048490 | -0.2590600 |
| 6                      | -1.9733340 | -0.9842650 | -0.2374070 |
| 8                      | -2.7843840 | -1.8203500 | 0.1605240  |
| 7                      | -2.1203590 | 0.3592470  | -0.0262790 |
| 1                      | -1.4960930 | 1.0127200  | -0.5101790 |
| 6                      | -3.3346810 | 0.8604500  | 0.5904160  |
| 1                      | -3.5774930 | 0.2538940  | 1.4758080  |
| 1                      | -3.1762930 | 1.9060640  | 0.8935390  |
| 1                      | -4.2016860 | 0.8132840  | -0.0933950 |
| 6                      | 3.3589660  | -1.2647700 | -0.3400240 |
| 1                      | 3.7234820  | -1.8266500 | 0.5334350  |
| 1                      | 4.2140120  | -0.8774920 | -0.9125950 |
| 1                      | 2.7964400  | -1.9484410 | -0.9969300 |
| 6                      | 2.4591570  | -0.1017620 | 0.0302310  |
| 8                      | 2.2153750  | 0.8069520  | -0.7762420 |
| 7                      | 1.9409560  | -0.1307620 | 1.2844090  |
| 1                      | 2.1194870  | -0.9432580 | 1.8625610  |
| 6                      | 1.0099090  | 0.8856860  | 1.7561760  |
| 1                      | 1.3590560  | 1.8738820  | 1.4216360  |

|                                        |            |            |            |
|----------------------------------------|------------|------------|------------|
| 1                                      | -0.0084760 | 0.7204410  | 1.3686070  |
| 1                                      | 0.9900100  | 0.8663180  | 2.8552040  |
| Trimer11-Methanol-Methanol-Methanol    |            |            |            |
| 8                                      | -0.7864650 | 1.6398200  | -0.7075830 |
| 1                                      | -0.0288220 | 1.8609310  | -1.2679840 |
| 6                                      | -0.4186980 | 1.9971430  | 0.6349420  |
| 1                                      | -1.3073360 | 1.8178740  | 1.2574010  |
| 1                                      | 0.4129010  | 1.3758310  | 1.0042890  |
| 1                                      | -0.1596270 | 3.0676700  | 0.7060890  |
| 8                                      | -0.8048600 | -1.1079010 | -0.4399080 |
| 1                                      | -0.9142220 | -0.1575010 | -0.6529940 |
| 6                                      | -1.9987110 | -1.5274340 | 0.2046300  |
| 1                                      | -1.8783570 | -2.5877000 | 0.4731030  |
| 1                                      | -2.2025040 | -0.9589320 | 1.1320280  |
| 1                                      | -2.8779020 | -1.4379170 | -0.4596150 |
| 8                                      | 1.6433380  | -0.6512830 | 0.7675900  |
| 1                                      | 0.7700700  | -0.9650930 | 0.4567040  |
| 6                                      | 2.3991700  | -0.4523570 | -0.4084480 |
| 1                                      | 3.4026040  | -0.1046680 | -0.1156620 |
| 1                                      | 2.5181170  | -1.3776040 | -1.0046890 |
| 1                                      | 1.9584060  | 0.3179150  | -1.0762070 |
| Trimer12-Methanol-Methanol-Methylamine |            |            |            |
| 8                                      | 0.2957150  | 1.2517080  | -0.5312610 |
| 1                                      | 0.9954300  | 0.5596840  | -0.4098590 |
| 6                                      | 0.7584580  | 2.4106250  | 0.1405490  |
| 1                                      | -0.0409310 | 3.1669740  | 0.1069990  |
| 1                                      | 1.0009350  | 2.2190480  | 1.2042570  |
| 1                                      | 1.6551040  | 2.8407770  | -0.3454400 |
| 8                                      | -1.6484300 | -0.2637900 | 0.7125800  |
| 1                                      | -1.0025220 | 0.3551300  | 0.3108270  |
| 6                                      | -2.6205890 | -0.4854850 | -0.2892500 |
| 1                                      | -3.3752750 | -1.1791340 | 0.1155220  |
| 1                                      | -3.1437180 | 0.4439220  | -0.5891350 |
| 1                                      | -2.1978030 | -0.9432490 | -1.2062800 |
| 7                                      | 1.9805980  | -0.8587660 | 0.0979650  |
| 1                                      | 2.1694410  | -0.7687790 | 1.1005500  |
| 1                                      | 2.8943260  | -1.0413200 | -0.3255270 |
| 6                                      | 1.1006710  | -2.0260670 | -0.1104240 |
| 1                                      | 0.9579200  | -2.1704550 | -1.1929870 |
| 1                                      | 1.4937530  | -2.9675080 | 0.3158480  |
| 1                                      | 0.1196370  | -1.8015070 | 0.3336640  |
| Trimer13-Methanol-Methanol-NMA         |            |            |            |
| 8                                      | -1.2737460 | 1.2657760  | -0.5253710 |
| 1                                      | -0.3141880 | 1.0894870  | -0.6313560 |
| 6                                      | -1.3667720 | 2.5767480  | 0.0147200  |



|                                           |            |            |            |
|-------------------------------------------|------------|------------|------------|
| 1                                         | -2.4258190 | 2.7718600  | 0.2435000  |
| 1                                         | -0.7819010 | 2.6883310  | 0.9463810  |
| 1                                         | -1.0210290 | 3.3404370  | -0.7060020 |
| 8                                         | -2.2542860 | -0.8319940 | 0.9462800  |
| 1                                         | -1.9061740 | -0.0301130 | 0.5007910  |
| 6                                         | -3.3331110 | -1.2577350 | 0.1378010  |
| 1                                         | -3.7663650 | -2.1620990 | 0.5950310  |
| 1                                         | -4.1368030 | -0.4987780 | 0.0650690  |
| 1                                         | -3.0218650 | -1.5151640 | -0.8946830 |
| 6                                         | 3.3928450  | 0.2516210  | 0.7608040  |
| 1                                         | 3.9797970  | -0.6590700 | 0.9538830  |
| 1                                         | 3.1475760  | 0.7344850  | 1.7202850  |
| 1                                         | 3.9989520  | 0.9611440  | 0.1782210  |
| 6                                         | 2.1034040  | -0.0108770 | 0.0053350  |
| 8                                         | 1.4311300  | 0.9228190  | -0.4560680 |
| 7                                         | 1.7554110  | -1.3132570 | -0.1383210 |
| 1                                         | 2.2978160  | -2.0113000 | 0.3559090  |
| 6                                         | 0.5099400  | -1.7129300 | -0.7835190 |
| 1                                         | -0.3612900 | -1.5727580 | -0.1231950 |
| 1                                         | 0.3719020  | -1.1067910 | -1.6916140 |
| 1                                         | 0.5888920  | -2.7706420 | -1.0735470 |
| Trimer14-Methanol-Methylamine-Methylamine |            |            |            |
| 8                                         | 0.0441390  | 1.5757320  | -0.7214660 |
| 1                                         | 0.7153400  | 0.9738040  | -0.3142110 |
| 6                                         | -0.3609530 | 2.4457180  | 0.3156490  |
| 1                                         | -1.1563010 | 3.1007280  | -0.0752450 |
| 1                                         | -0.7700100 | 1.9075670  | 1.1956600  |
| 1                                         | 0.4630300  | 3.0949420  | 0.6729000  |
| 7                                         | -1.2795530 | -1.1837440 | -0.4226550 |
| 1                                         | -1.3994390 | -1.6927980 | -1.3021380 |
| 1                                         | -1.0884240 | -0.2128830 | -0.7015460 |
| 6                                         | -2.5451140 | -1.2240150 | 0.3179840  |
| 1                                         | -2.4418170 | -0.6319090 | 1.2419800  |
| 1                                         | -3.4236010 | -0.8330340 | -0.2330490 |
| 1                                         | -2.7697450 | -2.2611360 | 0.6173000  |
| 7                                         | 1.5234150  | -0.4470410 | 0.5142080  |
| 1                                         | 0.6746790  | -1.0195470 | 0.3912300  |
| 1                                         | 1.6852930  | -0.3984400 | 1.5232080  |
| 6                                         | 2.6623400  | -1.1173340 | -0.1241340 |
| 1                                         | 3.5697530  | -0.5022180 | -0.0110650 |
| 1                                         | 2.8818380  | -2.1278190 | 0.2718700  |
| 1                                         | 2.4616260  | -1.2138310 | -1.2030310 |
| Trimer15-Methanol-Methylamine-NMA         |            |            |            |
| 8                                         | -2.3916520 | -1.6460470 | 0.1219050  |
| 1                                         | -2.7910480 | -2.5212900 | 0.2134450  |

|                           |            |            |            |
|---------------------------|------------|------------|------------|
| 6                         | -2.5820290 | -1.2473150 | -1.2365350 |
| 1                         | -2.1764200 | -0.2285150 | -1.3258790 |
| 1                         | -2.0528730 | -1.9154440 | -1.9434100 |
| 1                         | -3.6533400 | -1.2268700 | -1.5128310 |
| 7                         | -1.3914990 | 1.8767520  | -0.5252750 |
| 1                         | -1.3439340 | 2.8489200  | -0.8410200 |
| 1                         | -0.4157280 | 1.6319310  | -0.3239450 |
| 6                         | -2.1428290 | 1.8379150  | 0.7349490  |
| 1                         | -2.2378130 | 0.7906950  | 1.0645890  |
| 1                         | -1.7014490 | 2.4257010  | 1.5663610  |
| 1                         | -3.1652660 | 2.2168900  | 0.5660520  |
| 6                         | 3.3225810  | -0.1272820 | -1.0739080 |
| 1                         | 3.9109130  | -1.0252080 | -0.8286400 |
| 1                         | 3.9794320  | 0.7544560  | -1.0706190 |
| 1                         | 2.9117590  | -0.2351150 | -2.0913230 |
| 6                         | 2.1767810  | 0.1211020  | -0.1050180 |
| 8                         | 1.6338000  | 1.2247850  | -0.0096400 |
| 7                         | 1.8053010  | -0.9603880 | 0.6393450  |
| 1                         | 2.2191290  | -1.8576160 | 0.4162490  |
| 6                         | 0.6550120  | -0.9206500 | 1.5313040  |
| 1                         | 0.5325570  | 0.1180030  | 1.8690450  |
| 1                         | -0.2749700 | -1.2430390 | 1.0340090  |
| 1                         | 0.8481550  | -1.5605740 | 2.4065570  |
| Trimer16-Methanol-NMA-NMA |            |            |            |
| 8                         | -2.9148490 | 0.2595960  | 0.1989240  |
| 1                         | -3.7348330 | 0.7585730  | 0.3177520  |
| 6                         | -3.1384850 | -0.6764470 | -0.8642930 |
| 1                         | -2.2068080 | -1.2475000 | -0.9789520 |
| 1                         | -3.9623410 | -1.3705470 | -0.6197590 |
| 1                         | -3.3705800 | -0.1654600 | -1.8161910 |
| 6                         | 0.0999030  | 1.3049330  | -1.8600230 |
| 1                         | -0.9375040 | 1.6492460  | -1.9996890 |
| 1                         | 0.1193200  | 0.2093980  | -1.9863720 |
| 1                         | 0.7509090  | 1.7699790  | -2.6135030 |
| 6                         | 0.6219570  | 1.6526120  | -0.4764540 |
| 8                         | 1.7939710  | 1.9739740  | -0.2548410 |
| 7                         | -0.3029660 | 1.5629660  | 0.5223830  |
| 1                         | -1.2300680 | 1.1817140  | 0.3282710  |
| 6                         | 0.1074340  | 1.7777790  | 1.8945740  |
| 1                         | 0.5486300  | 2.7799260  | 2.0187970  |
| 1                         | -0.7720780 | 1.6849540  | 2.5488060  |
| 1                         | 0.8693200  | 1.0432340  | 2.2120220  |
| 6                         | -0.3315600 | -1.7512480 | 1.5487480  |
| 1                         | 0.2448440  | -1.5190200 | 2.4575120  |
| 1                         | -0.7304240 | -2.7750630 | 1.6282280  |

|                                              |            |            |            |
|----------------------------------------------|------------|------------|------------|
| 1                                            | -1.1869610 | -1.0626530 | 1.4705590  |
| 6                                            | 0.4861140  | -1.6580070 | 0.2710290  |
| 8                                            | -0.0091120 | -1.9133500 | -0.8332790 |
| 7                                            | 1.7939880  | -1.3113340 | 0.4368500  |
| 1                                            | 2.0943940  | -1.0084150 | 1.3557360  |
| 6                                            | 2.7076690  | -1.1382460 | -0.6819760 |
| 1                                            | 2.8923960  | -0.0701030 | -0.8780750 |
| 1                                            | 3.6606490  | -1.6512970 | -0.4748530 |
| 1                                            | 2.2357100  | -1.5983940 | -1.5609780 |
| Trimer17-Methylamine-Methylamine-Methylamine |            |            |            |
| 7                                            | 1.4107880  | -1.1015140 | -0.6191510 |
| 1                                            | 1.2999660  | -0.0779750 | -0.6747450 |
| 1                                            | 1.9804240  | -1.3583170 | -1.4293310 |
| 6                                            | 2.1564290  | -1.4271460 | 0.6001980  |
| 1                                            | 2.2860410  | -2.5194320 | 0.6823450  |
| 1                                            | 3.1600120  | -0.9617430 | 0.6776230  |
| 1                                            | 1.5725280  | -1.1014530 | 1.4770380  |
| 7                                            | -1.6593110 | -0.6710060 | -0.6191440 |
| 1                                            | -2.1665510 | -1.0358660 | -1.4293380 |
| 1                                            | -0.7175320 | -1.0868990 | -0.6747320 |
| 6                                            | -2.3142060 | -1.1539100 | 0.6001830  |
| 1                                            | -1.7401360 | -0.8112270 | 1.4770380  |
| 1                                            | -3.3248920 | -0.7198620 | 0.6823630  |
| 1                                            | -2.4131140 | -2.2557290 | 0.6775360  |
| 7                                            | 0.2485590  | 1.7725200  | -0.6191670 |
| 1                                            | -0.5824460 | 1.1647810  | -0.6747580 |
| 1                                            | 0.1861210  | 2.3942640  | -1.4293290 |
| 6                                            | 0.1577540  | 2.5810580  | 0.6002020  |
| 1                                            | 1.0388890  | 3.2394570  | 0.6823450  |
| 1                                            | -0.7470940 | 3.2174700  | 0.6776510  |
| 1                                            | 0.1676680  | 1.9125210  | 1.4770280  |
| Trimer18-Methylamine-Methylamine-NMA         |            |            |            |
| 7                                            | -2.7999490 | -0.8149390 | -0.3511710 |
| 1                                            | -1.9083930 | -0.5394240 | -0.7771250 |
| 1                                            | -3.4607000 | -0.8753680 | -1.1296960 |
| 6                                            | -3.2309110 | 0.2627200  | 0.5444110  |
| 1                                            | -3.3458090 | 1.2585600  | 0.0696870  |
| 1                                            | -4.1960300 | -0.0021270 | 1.0081220  |
| 1                                            | -2.4961930 | 0.3674570  | 1.3597380  |
| 7                                            | 0.4438900  | 2.7152150  | -0.7734020 |
| 1                                            | 1.4193450  | 2.9874770  | -0.9166870 |
| 1                                            | 0.3949730  | 1.7334380  | -1.0609760 |
| 6                                            | 0.1420730  | 2.7777590  | 0.6590570  |
| 1                                            | -0.9029370 | 2.4672690  | 0.8197620  |
| 1                                            | 0.7781200  | 2.1440140  | 1.3134640  |

|                              |            |            |            |
|------------------------------|------------|------------|------------|
| 1                            | 0.2308310  | 3.8184460  | 1.0134470  |
| 6                            | 0.0210510  | -2.5938310 | 0.1591370  |
| 1                            | 0.3920240  | -3.0802000 | 1.0748910  |
| 1                            | 0.1721570  | -3.2803270 | -0.6912300 |
| 1                            | -1.0572250 | -2.3885900 | 0.2431230  |
| 6                            | 0.7398420  | -1.2908040 | -0.1378240 |
| 8                            | 0.2434600  | -0.4090100 | -0.8493860 |
| 7                            | 1.9766770  | -1.1648840 | 0.4286220  |
| 1                            | 2.3637930  | -1.9737510 | 0.9003920  |
| 6                            | 2.8490890  | -0.0387540 | 0.1449230  |
| 1                            | 2.2201800  | 0.8161680  | -0.1338830 |
| 1                            | 3.4322680  | 0.2184840  | 1.0423350  |
| 1                            | 3.5447150  | -0.2497340 | -0.6868520 |
| Trimer19-Methylamine-NMA-NMA |            |            |            |
| 7                            | 2.3499160  | 2.3673230  | 0.7077580  |
| 1                            | 1.7601440  | 1.6010310  | 1.0474770  |
| 1                            | 2.3911540  | 3.0419590  | 1.4754470  |
| 6                            | 1.6619840  | 2.9897100  | -0.4275920 |
| 1                            | 0.6473930  | 3.3829310  | -0.2122150 |
| 1                            | 2.2690110  | 3.8226410  | -0.8198210 |
| 1                            | 1.5641370  | 2.2476450  | -1.2372900 |
| 6                            | -2.4241690 | -0.9636410 | 1.5291940  |
| 1                            | -1.3382770 | -1.0758480 | 1.6657450  |
| 1                            | -2.8709790 | -1.9474640 | 1.3108100  |
| 1                            | -2.8832230 | -0.5965760 | 2.4602510  |
| 6                            | -2.7827730 | -0.0071500 | 0.4000960  |
| 8                            | -3.9405010 | 0.3270120  | 0.1547760  |
| 7                            | -1.7119500 | 0.4172400  | -0.3443160 |
| 1                            | -0.7722830 | 0.2381160  | 0.0112560  |
| 6                            | -1.9038880 | 1.4081650  | -1.3868950 |
| 1                            | -2.8101550 | 1.1596290  | -1.9584170 |
| 1                            | -2.0324650 | 2.4281300  | -0.9805470 |
| 1                            | -1.0323700 | 1.4014590  | -2.0587140 |
| 6                            | 3.3325850  | -0.8384850 | 0.4233840  |
| 1                            | 4.0062870  | -1.3508900 | -0.2804840 |
| 1                            | 3.5492410  | -1.1912200 | 1.4456490  |
| 1                            | 3.5052790  | 0.2489210  | 0.3990910  |
| 6                            | 1.8680470  | -1.0940970 | 0.1285100  |
| 8                            | 0.9720440  | -0.3861710 | 0.6172290  |
| 7                            | 1.6039470  | -2.1427070 | -0.6954850 |
| 1                            | 2.3817180  | -2.7325470 | -0.9679740 |
| 6                            | 0.2519300  | -2.5927960 | -0.9898150 |
| 1                            | -0.4271180 | -1.7303140 | -0.9594470 |
| 1                            | 0.2251360  | -3.0368370 | -1.9959930 |
| 1                            | -0.1006530 | -3.3407140 | -0.2578530 |

Trimer20-NMA-NMA-NMA

|   |            |            |            |
|---|------------|------------|------------|
| 6 | -0.3130150 | 1.0540970  | 1.9275210  |
| 1 | 0.7759350  | 0.9295290  | 2.0135470  |
| 1 | -0.7912540 | 0.0620770  | 1.9140170  |
| 1 | -0.7044580 | 1.6014770  | 2.7991070  |
| 6 | -0.7235770 | 1.7974630  | 0.6681180  |
| 8 | -1.9021450 | 2.1279100  | 0.4584260  |
| 7 | 0.2932010  | 2.0541510  | -0.1946980 |
| 1 | 1.2170010  | 1.6692530  | 0.0177560  |
| 6 | 0.0901140  | 2.7824680  | -1.4332010 |
| 1 | -0.9135690 | 3.2290160  | -1.4013630 |
| 1 | 0.8422570  | 3.5814650  | -1.5334060 |
| 1 | 0.1575640  | 2.1209120  | -2.3138560 |
| 6 | -2.0032860 | -0.2385110 | -1.9132300 |
| 1 | -2.2573350 | 0.8011200  | -1.6633920 |
| 1 | -2.6217270 | -0.5770810 | -2.7606270 |
| 1 | -0.9503340 | -0.2989270 | -2.2294150 |
| 6 | -2.2281150 | -1.1929840 | -0.7508690 |
| 8 | -1.8737170 | -2.3755990 | -0.7841510 |
| 7 | -2.9016850 | -0.6587980 | 0.3114710  |
| 1 | -2.9021740 | 0.3579080  | 0.4123820  |
| 6 | -3.1478740 | -1.4841290 | 1.4800670  |
| 1 | -3.6677760 | -2.4071020 | 1.1815380  |
| 1 | -2.2130440 | -1.7832450 | 1.9895960  |
| 1 | -3.7779950 | -0.9242150 | 2.1863610  |
| 6 | 4.7924350  | -0.6593850 | 0.1787810  |
| 1 | 5.1367240  | -1.6473100 | -0.1629840 |
| 1 | 5.1228160  | -0.4999650 | 1.2175140  |
| 1 | 5.2581720  | 0.1234180  | -0.4386220 |
| 6 | 3.2848030  | -0.4844750 | 0.1191840  |
| 8 | 2.7645700  | 0.6157180  | 0.3500190  |
| 7 | 2.5796260  | -1.6009990 | -0.1991680 |
| 1 | 3.0923070  | -2.4681150 | -0.3083780 |
| 6 | 1.1252920  | -1.6463910 | -0.2396050 |
| 1 | 0.6990010  | -2.0613130 | 0.6891660  |
| 1 | 0.7537580  | -0.6213940 | -0.3663800 |
| 1 | 0.7758110  | -2.2611410 | -1.0807480 |

Table S9 Interaction energies(kcal-mol<sup>-1</sup>) of trimers obtained using various methods

|                        | DLPNO-CCSD(T)<br>Complete Basis Set | MP2<br>cc-pVTZ | B3LYP<br>cc-pVTZ | B3LYP-D3<br>cc-pVTZ | M06-2X<br>cc-pVTZ | M06-2X-D3<br>cc-pVTZ | AMOEBA09      | PBFF          |
|------------------------|-------------------------------------|----------------|------------------|---------------------|-------------------|----------------------|---------------|---------------|
| Trimer01               | -15.30                              | -14.16(1.14)   | -14.57(0.74)     | -17.03(-1.73)       | -16.91(-1.60)     | -16.95(-1.64)        | -16.01(-0.70) | -15.27(0.04)  |
| Trimer02               | -15.94                              | -14.71(1.23)   | -14.49(1.45)     | -17.53(-1.59)       | -17.10(-1.16)     | -17.22(-1.28)        | -15.98(-0.04) | -15.49(0.45)  |
| Trimer03               | -15.05                              | -13.96(1.09)   | -13.49(1.56)     | -16.84(-1.79)       | -15.85(-0.79)     | -16.00(-0.95)        | -16.76(-1.71) | -14.34(0.71)  |
| Trimer04               | -16.12                              | -14.55(1.57)   | -14.46(1.66)     | -17.91(-1.79)       | -16.97(-0.86)     | -17.21(-1.10)        | -17.45(-1.34) | -15.30(0.82)  |
| Trimer05               | -16.37                              | -14.93(1.45)   | -13.85(2.53)     | -17.77(-1.39)       | -17.20(-0.83)     | -17.42(-1.05)        | -15.48(0.89)  | -16.42(-0.05) |
| Trimer06               | -15.59                              | -14.44(1.15)   | -13.14(2.44)     | -17.32(-1.74)       | -16.20(-0.62)     | -16.46(-0.87)        | -16.38(-0.79) | -15.56(0.02)  |
| Trimer07               | -17.08                              | -15.57(1.51)   | -14.66(2.42)     | -18.86(-1.78)       | -17.78(-0.70)     | -18.13(-1.05)        | -17.24(-0.16) | -16.34(0.74)  |
| Trimer08               | -12.26                              | -11.17(1.10)   | -9.69(2.57)      | -13.64(-1.38)       | -12.43(-0.17)     | -12.72(-0.46)        | -13.97(-1.71) | -12.02(0.25)  |
| Trimer09               | -15.33                              | -14.36(0.97)   | -11.56(3.77)     | -16.97(-1.64)       | -15.86(-0.54)     | -16.33(-1.01)        | -16.26(-0.94) | -14.59(0.73)  |
| Trimer10               | -17.27                              | -15.67(1.60)   | -11.62(5.65)     | -19.07(-1.80)       | -17.91(-0.64)     | -18.64(-1.36)        | -17.47(-0.20) | -16.63(0.64)  |
| Trimer11               | -13.84                              | -12.50(1.34)   | -10.15(3.69)     | -15.32(-1.48)       | -14.17(-0.33)     | -14.53(-0.69)        | -13.67(0.17)  | -14.40(-0.55) |
| Trimer12               | -16.83                              | -15.81(1.02)   | -13.73(3.10)     | -18.52(-1.70)       | -16.92(-0.09)     | -17.31(-0.48)        | -16.46(0.37)  | -16.94(-0.11) |
| Trimer13               | -17.59                              | -16.13(1.46)   | -13.98(3.61)     | -19.34(-1.74)       | -17.86(-0.27)     | -18.42(-0.83)        | -17.00(0.59)  | -16.68(0.91)  |
| Trimer14               | -15.09                              | -14.15(0.95)   | -11.85(3.24)     | -16.47(-1.37)       | -14.98(0.11)      | -15.40(-0.31)        | -15.43(-0.34) | -15.72(-0.62) |
| Trimer15               | -8.20                               | -7.24(0.95)    | -4.02(4.17)      | -9.22(-1.03)        | -7.49(0.71)       | -8.15(0.05)          | -9.07(-0.87)  | -7.32(0.88)   |
| Trimer16               | -15.89                              | -14.13(1.76)   | -5.86(10.03)     | -17.28(-1.39)       | -16.05(-0.15)     | -17.03(-1.14)        | -15.86(0.04)  | -15.45(0.44)  |
| Trimer17               | -11.68                              | -11.03(0.65)   | -8.37(3.31)      | -12.77(-1.09)       | -11.23(0.45)      | -11.71(-0.03)        | -12.07(-0.40) | -12.21(-0.53) |
| Trimer18               | -9.03                               | -7.78(1.25)    | -4.02(5.00)      | -10.04(-1.01)       | -8.81(0.22)       | -9.50(-0.47)         | -8.92(0.10)   | -9.77(-0.74)  |
| Trimer19               | -13.62                              | -12.28(1.34)   | -7.49(6.14)      | -14.82(-1.20)       | -13.33(0.29)      | -14.29(-0.67)        | -13.54(0.08)  | -14.80(-1.18) |
| Trimer20               | -21.12                              | -19.11(2.01)   | -10.43(10.69)    | -22.69(-1.57)       | -21.64(-0.52)     | -22.95(-1.84)        | -19.97(1.15)  | -22.79(-1.67) |
| Root Mean Square Error |                                     | 1.31           | 4.64             | 1.53                | 0.67              | 0.98                 | 0.82          | 0.72          |
| Mean Absolute Error    |                                     | 1.28           | 3.89             | 1.51                | 0.55              | 0.86                 | 0.63          | 0.60          |
| Maximum Absolute Error |                                     | 2.01           | 10.69            | 1.80                | 1.60              | 1.84                 | 1.71          | 1.67          |
